# Supplementary material for: miRNAs involved in the development and differentiation of fertile and sterile flowers in Viburnum macrocephalum f. keteleeri
Source: PubMed Central journal article supplement (PMC5640959; doi:10.1186/s12864-017-4180-x), 2017-10-13

**Additional file 5.** Fold-back structures for known miRNA from *Viburnum macrocephalum* f. *keteleeri*. Precursor sequences for known miRNAs were shown in black letters with miRNA sequences highlighted in red.

miR156a-5p

CAAGAGAAACGCAAAGAAACUGACAGAAGAGAGUGAGCACACAAAGGCAAUUUGC  
AUAUCAUUGCACUUGCUCUUCUCUUGCGU **GCUCACUGCUCUUUCUGUCAGA**UUCCGG  
UGCUGAUCUCUUU

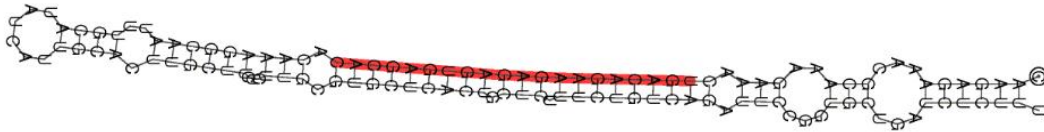

miR156g

AUAACGAAGG **CGACAGAAGAGAGUGAGCAC**ACAUGGCUCUUUUUCUAGCAUGCUC  
AUGCUCGAAAGCUCUGCGUGCUUACUCUCUUCUUGUCUCCUGCUCUCU

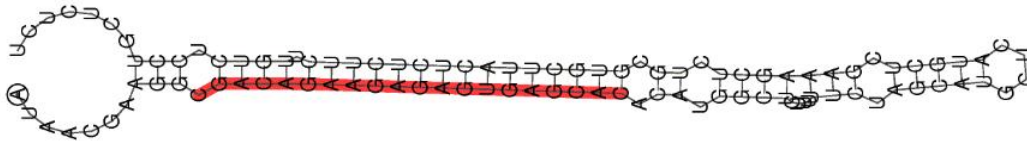

miR156h

AUGAAAAAUGU **UGACAGAAGAAAGAGAGCAC**AACCUGGGAUUAGCAAAAAGAUAG  
UUUUGCCCUUGUCGGGAGUGUGCUCUCUUCCUUCUGCCACCAUCAUUGCG

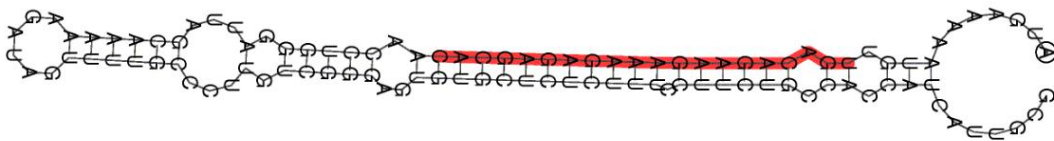

miR156j

UU **UGACAGAAGAGAGAGAGCAC**AGUUUGAGUCGCCAAUUCCCUUGUAGCUCUCUA  
GUUUAGUGUCCAU

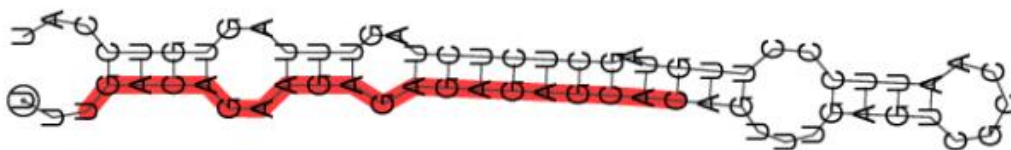

miR157a-5p

GUGUUGACAGAAGAUAGAGAGCACAGAUGAUGAGAUACAAUUCGGAGCAUGUUCU  
UUGCAUCUUACUCCUUGUGCUCUCUAGCCUUCUGUCAUCACC

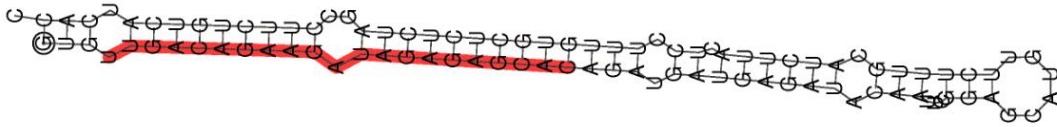

miR157d

GUGGAGGGUGAUAGUGUGGUUGCUGACAGAAGAUAGAGAGCACUAAGGAUGCUAU  
GCAAAACAGACACAGAU AUGUGUUUCUAAUUGUAUUUCAUACUUUAACCUCAAAG  
UUGAUUAAAAAAAAAGAAAGAAAGAUAGAAGAGCUAGAAGACUAUCUGCAUCUCUA  
UUCCUAUGUGCUCUCUAUGCUUCUGUCAUCACCUUUCUUUCUCUAUUUCUCUCUAC

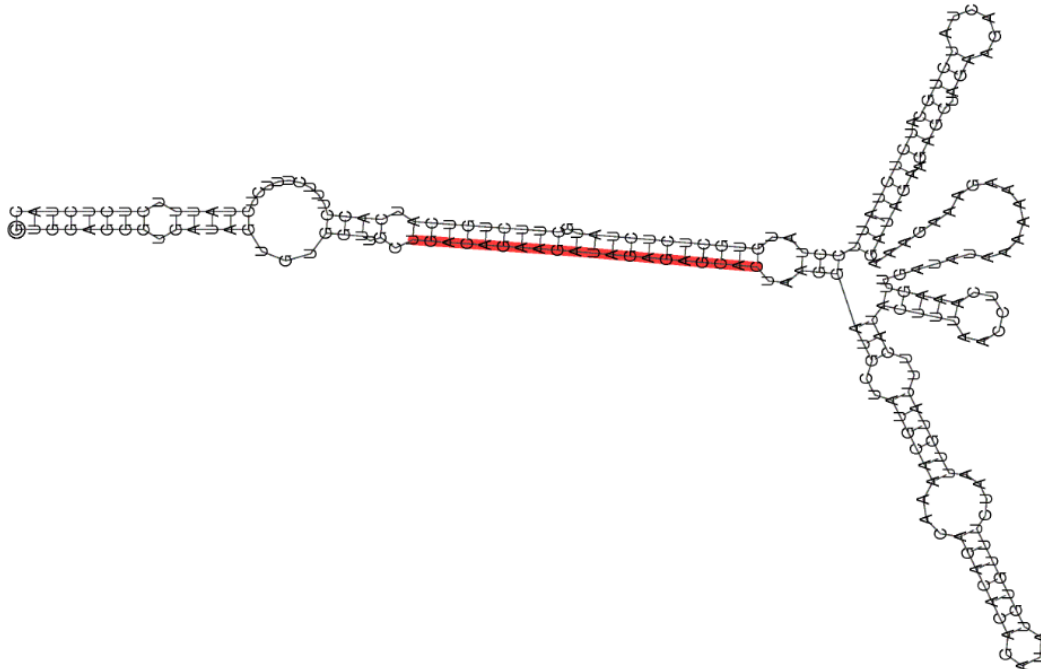

miR159a

GUAGAGCUCCUAAAAGUCAAACAUGAGUUGAGCAGGGUAAAAGAAAAGCUGCUGCAA  
GCUAUGGAUCCCAUAAGCCCUAUCCUUGUAAAAGUAAAAAGGAUUUGGUUAUAU  
GGAUUGCAUAUCUCAGGAGCUUUAACUUGCCCUUAAAUGGCUUUUACUCUUCUUU  
GGAUUGAAGGGAGCUCUAC

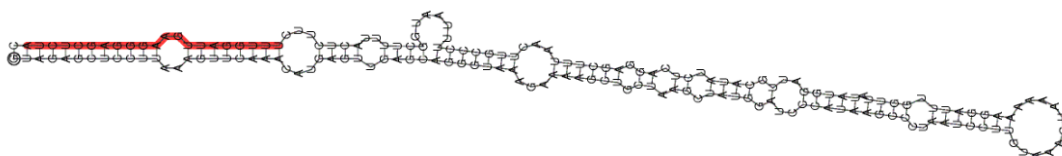

miR159b-3p

GGAAGAGCUCCUUGAAGUCAAUGGAGGGUUUAGCAGGGUGAAGUAAAGCUGCUA  
AGCUAUGGAUCCCAUAAGCCUUAUCAAAUUCAAUAUAAUUGAUGAUAAAGGUUUUU  
UUUAUGGAUGCCAUAUCUCAGGAGCUUCACUUAACCCCUUAAUGGCUUCACUCU  
UCUUUGGAUUGAAGGGAGCUCUUCaucucuc

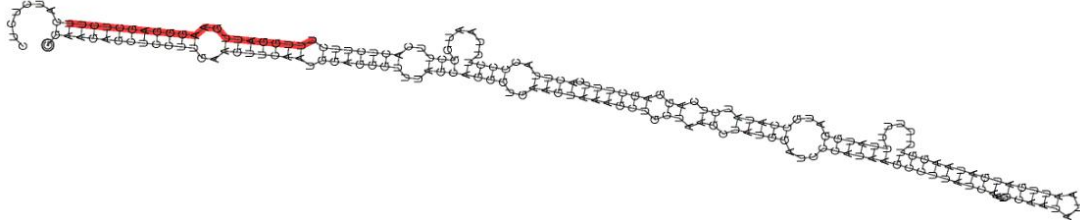

miR159c

GUGUAACAGAAGGAGCUCCCUUCCUCCAAAACGAAGAGGACAAGAUUUGAGGAAC  
UAAAUGCAGAAUCUAAGAGUUCAUGUCUCCUCAUAGAGAGUGCGCGGUGUUA  
AAGCUUGAAGAAAGCACACUUUAAGGGGAUUGCACGACCUCUAGAUUCUCCUC  
UUUCUCUACAUUCAUUCUCUCUCUCUCG UUUGGAUUGAAGGGAGCUCUUCUUCU  
UCUUC

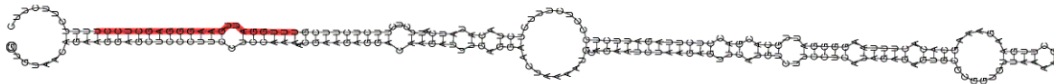

miR160a-5p

GUAUGCCUGGCUCCUGUAUGCCAUAUGCUGAGCCCAUCGAGUAUCGAUGACCUC  
GUGGAUGGCGUAUGAGGAGCCAUGCAUUAU

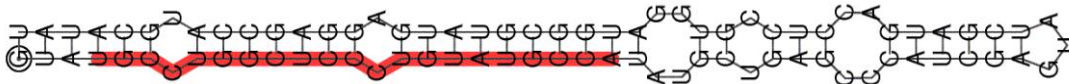

miR162a-3p

UAGUUGGAAGAAGAGUGAGAGUCGCUGGAGGCAGCGGUUCAUCGAUCUCUCCUG  
UGAACACAUUAAAAAUGUAAAAGCAUGAAUAGAUCGAUAAACCUCUGCAUCCAGC  
GUUUGCCUCUUGUAUCUUUCUUAUUGACUU

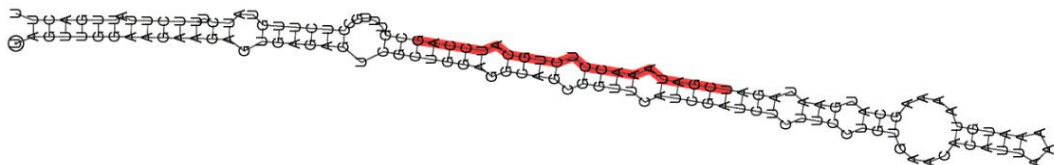

miR162a-5p

UAGUUGGAAGAAGAGUGAGAGUCGCUGGAGGCAGCGGUUCAUCGAUCUCUCCUG  
UGAACACAUUAAAAAUGUAAAAGCAUGAAUAGAUCGAUAAACCUCUGCAUCCAGC  
GUUUGCCUCUUGUAUCUUUCUUAUUGACUU

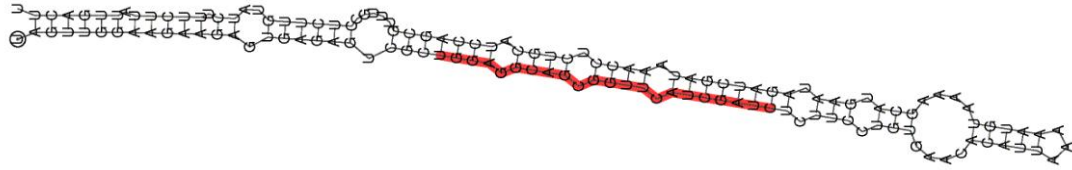

miR164a

GGGUGAGAAUCUCCAUGU **UGGAGAAGCAGGGCACGUGCA** AACCAACAAACACGAA  
 AUCCGUCUCAUUUGCUUAUUUGCACGUACUUAACUUCUCCAACAUGAGCUCUUCAC  
 CC

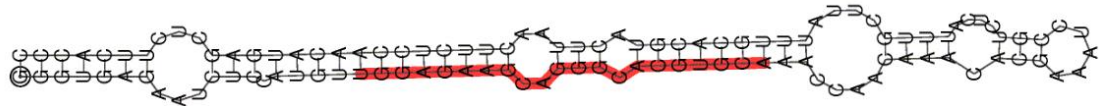

miR164c-5p

U AACACUUGA **UGGAGAAGCAGGGCACGUGCG** AACACAAAUGAAAUCGAUCGGUAC  
 UUGUUGAUCAUAUUUUCGCACGUGUUCUACUACUCCAACACGUGUCU

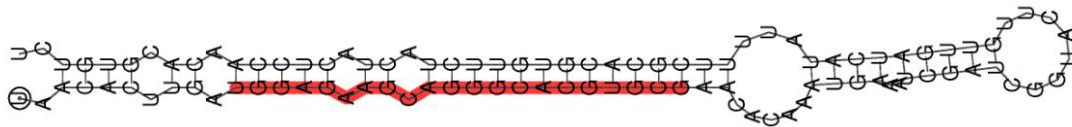

miR165a-3p

GUUGAGGGGAAUGUUGUCUGGAUCGAGGAUAUUAUAGAUUAUACAUGUGUAUG  
 UAAUGAUUCAAGUGAUCAUAGAGAGUAUCC **UCGGACCAGGCUUCAUCCCCC** CCA  
 AC

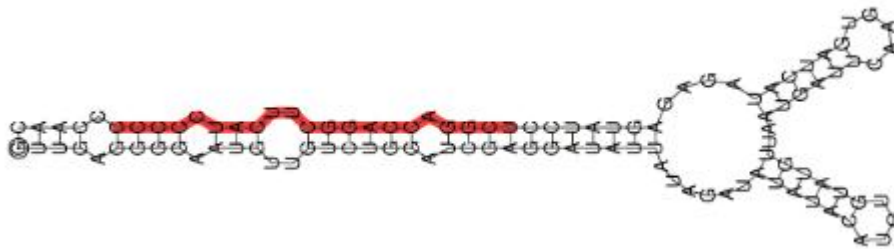

miR166a-3p

AGGGGCUUUCUCUUUUGAGGGGACUGUUGUCUGGCUCGAGGACUCUGGCUCGCUC  
 UAUUCAUGUUGGAUCUCUUUCGAUCUAACAAUCGAAUUGAACCUUCAGAUUUCAG  
 AUUUGAUUAGGGUUUAGCGUCU **UCGGACCAGGCUUCAUCCCCC** CCAUUGUUGC  
 UCCCU

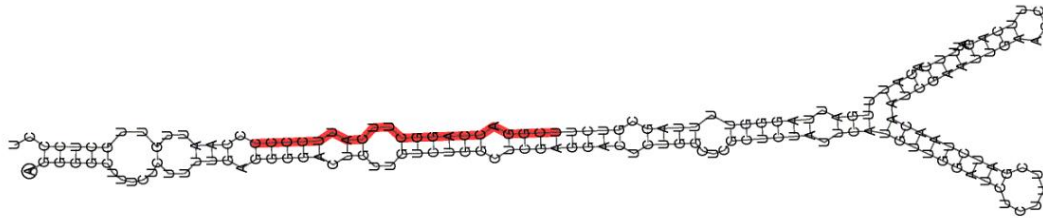

miR166e-5p

UUGAGG**GGAAUGUUGUCUGGCACGAGG**CCCUU AACUAGAUCUAUAUUUGAUUAU  
 AUAUAUAUGUCUCUUCUUUAUUCAUUAGUCUAUACAUGAAUGAUCAUUUUACGGU  
 UAAUGACGUCGGACCAGGCUUCAUUCCCCUCAA

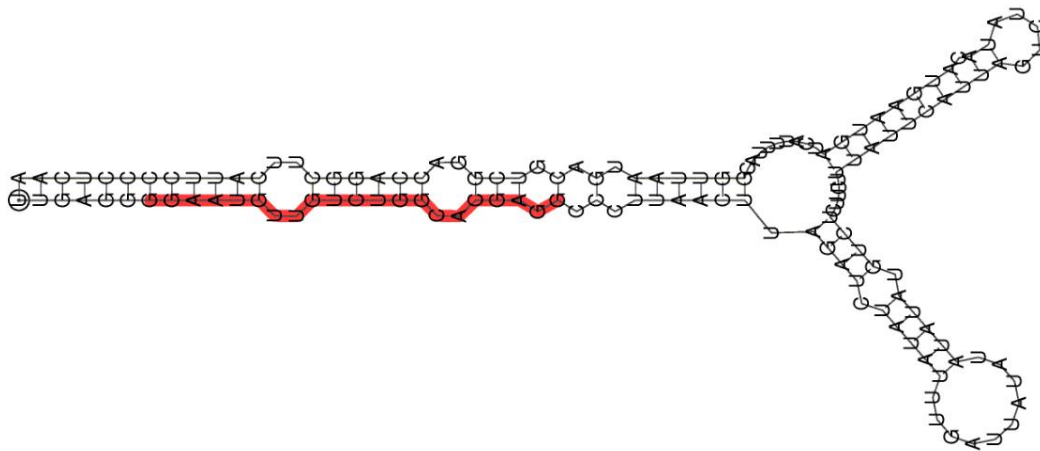

miR167a-5p

UGGUGCACCGGCAUCUGA**UGAAGCUGCCAGCAUGAUCUA**AUUAGCUUUCUUUAUC  
 CUUUGUUGUGUUUCAUGACGAUGGUUAAGAGAUCAAGUCUCGAUUAGAUC AUGUUC  
 GCAGUUUCACCCGUUGACUGUCGCACCC

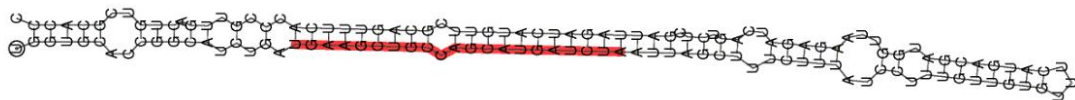

miR167c-5p

CCAGUAGCAGU**UAAGCUGCCAGCAUGAUCUUG**UCUCCUCUCUUAGGUUUCAUAU  
 AUAGUUAUAUAAUAUUUUUAUAUUAUUUCUUGUUCUACAAGAUUAUAUGAUCAUAG  
 CUUAGAGAGAGAGAGACUAGGUCAUGCUGGUAGUUUCACCUGCUAAUG

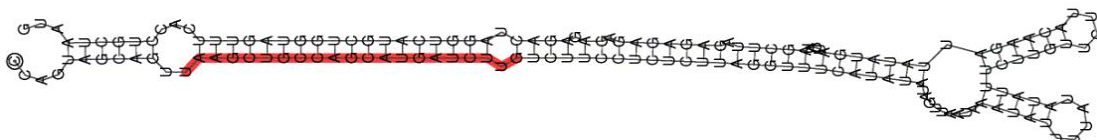

miR167d

UGUUGGUUUUUAGAAGCUGAAGCUGCCAGCAUGAUCUGGUAAUCGCUACAUACGA  
CAUACACACAUCACUAAACUUCUUUAUAAUUUUAUGCACACACAUCAGCUCUUA  
UGGCCACAACUCAAGUUAUAAUUAGUGCAUGAUCUCUAGUUAUUUGACUGCUUU  
UAAUUAUUGUUUAUGGAUUCACGCAUGUGUGUGUAUGUACAUAUUUACAUGCAU  
GCACUUUGUGUAUGGUACACAUCAAUUGAACCCGUUCAAUUUCUGUUUUUAU  
AGUAUAUAUAGAUGUAUGUGGUGUGUGUCAGUGUGUGUGUUUAUAG  
AUAGUAGUACUAGGUCAUCCUGCAGCUUCAGUCACUAAAUCACCAACA

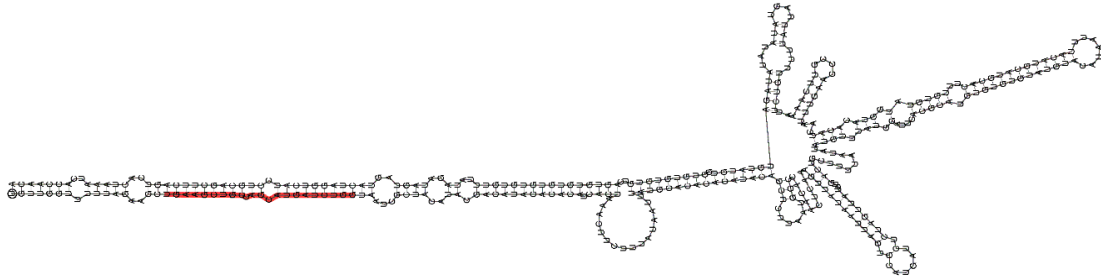

miR168a-3p

CACCAUCGGGCUCGGAUUCGCUUGGUGCAGGUCGGGAACCAAUUCGGCUGACACA  
GCCUCGUGACUUUAAACCUUUAUUGGUUUGUGAGCAGGGAUUGGAUCCCGCCUU  
GCAUCAACUGAAUCGGAUCCUCGAGGUG

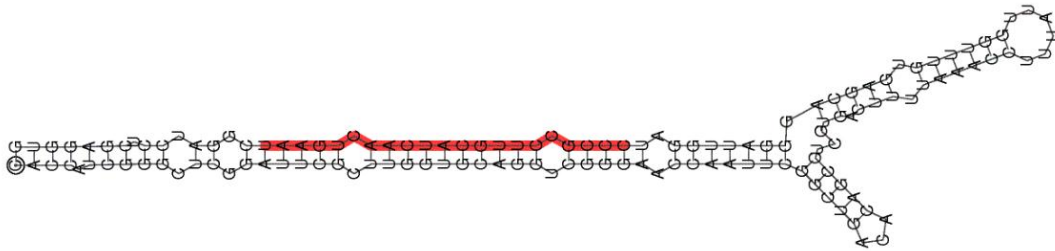

miR168a-5p

CACCAUCGGGCUCGGAUUCGCUUGGUGCAGGUCGGGAACCAAUUCGGCUGACACA  
GCCUCGUGACUUUAAACCUUUAUUGGUUUGUGAGCAGGGAUUGGAUCCCGCCUU  
GCAUCAACUGAAUCGGAUCCUCGAGGUG

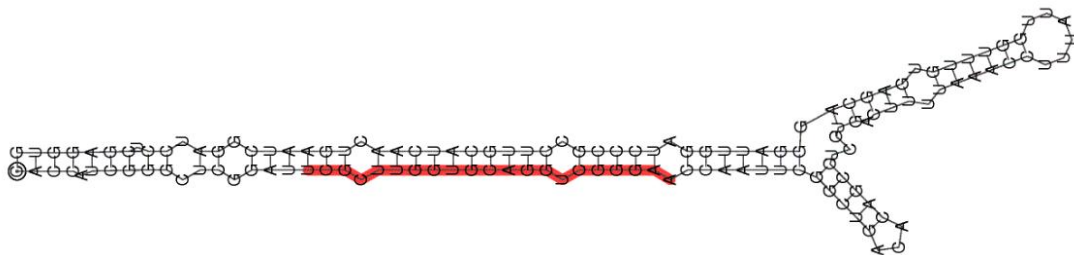

miR169a-5p

GUGACGAAAGUAGUGUGCAGCCAAGGAUGACUUGCCGAUUUAAAUGAUCUUUCUU  
UAUACUCUAUUAAGACAAUUUAGUUUCAACUUUUUUUUUUUUUUUUUUUGAAG  
GAUUCAGGAAGAAAUUAGGAUAUAUUAUCCGUAUAAAAUACAAGAUUAUAAAA

CCAAAAGAAAAGUAACAUGAUCGGCAAGUUGUCCUUGGCUACACGUUACUUG  
UGUCGC

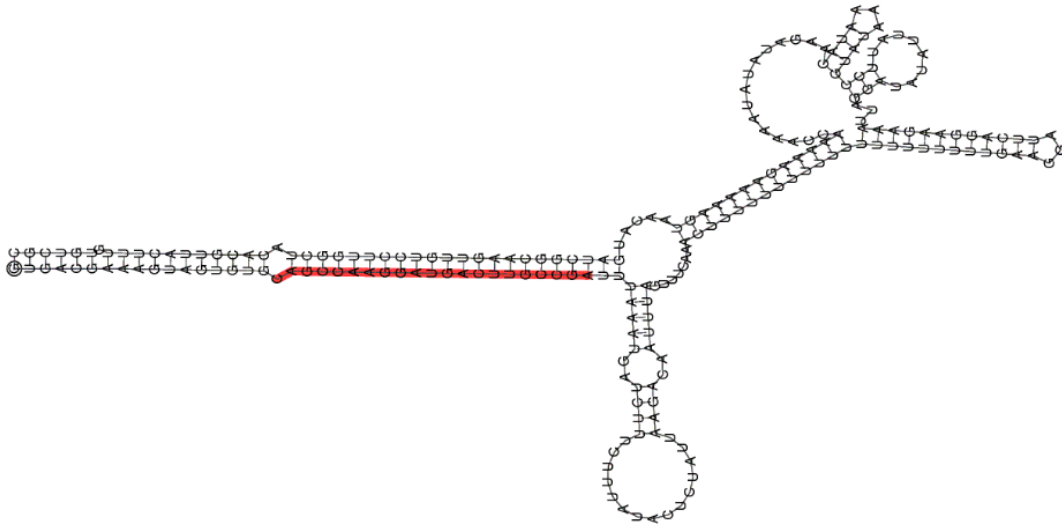

miR169b-5p

CCCAACGGAGUAGAAUUGCAUGAAGUGGAGUAGAGUAUAAUG **CAGCCAAGGAUGA**  
**CUUGCCGG**AACGUUGUUAACCAUGCAUAUGAAUAAUGUGAUGAUUAAUUAUGUGA  
UGAACAUAAUUCUGGCAAGUUGUCCUUCGGCUACAUUUUGCUCUCUUCUUCUCAU  
GCAAACUUCCUUGGG

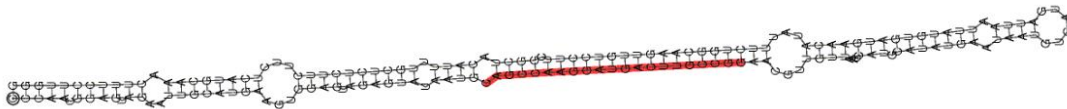

miR169h

UCAUAUAAGAGAAA AUGGUGACAUGAAGAAUGAGAACUUGUGUGG **UAGCCAAGGA**  
**UGACUUGCCUG**CGUUUAGACCAUAUAUAUCAAAAGACUCACUCGAUCGAUAGUCU  
UAGAGUUGGUUGGUCGUCAGGCAGUCUCCUUGGCUAUUCAAAACAAUUCUCAUUCU  
CUUCAUUCACAUUUCUCUUUUUUGG

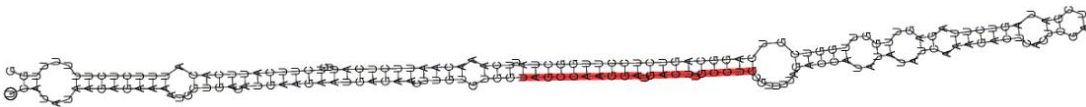

miR171a-3p

AUGAGAGAGUCCCUUUGAUUAUUGGCCUGGUUCACUCAGAUCUUAACCUGACCACAC  
ACGUAGAUUAACAUUAUUCUCUCUAGAUUAUC **UGAUUGAGCCGCGCCAAUAUC**UC  
AGUACUCUCUCGU

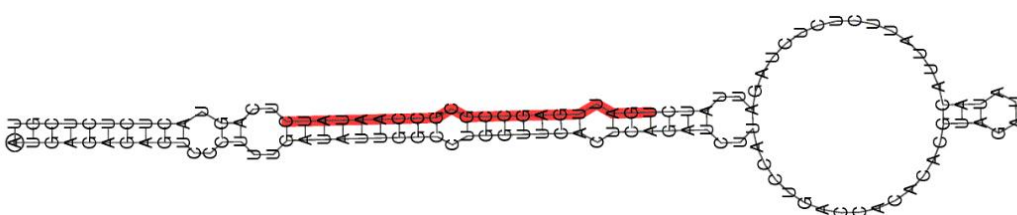

miR171b-3p

UGCAAGGUAACGCGAGAUAUUAGUGCGGUUCAAUCAAAUAGUCGUCCUCUUAACU  
CAUGGAGAACGGUGUUGUUCGA **UUGAGCCGUGCCAAUAUCACG** CGGUAAACCAA  
AAUGGCA

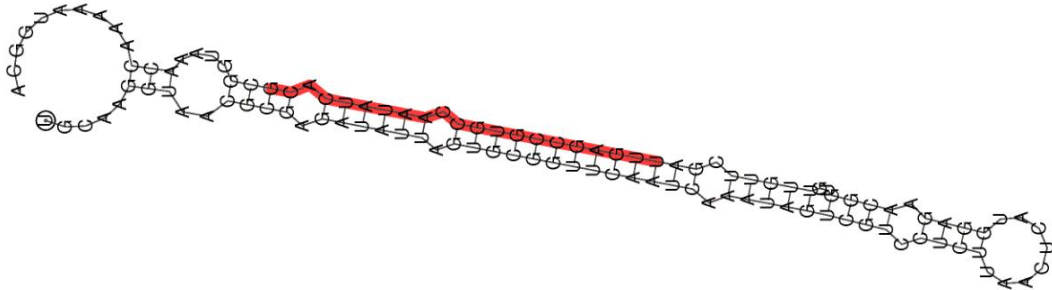

miR172a

UGCUGUGGCAUCAUCAAGAUUCACAUCUGUUGAUGGACGGUGGUGAUUCACUCUC  
CACAAAGUUCUCUAUGAAAUG **AGAAUCUUGAUGAUGCUGCAU** CGGC

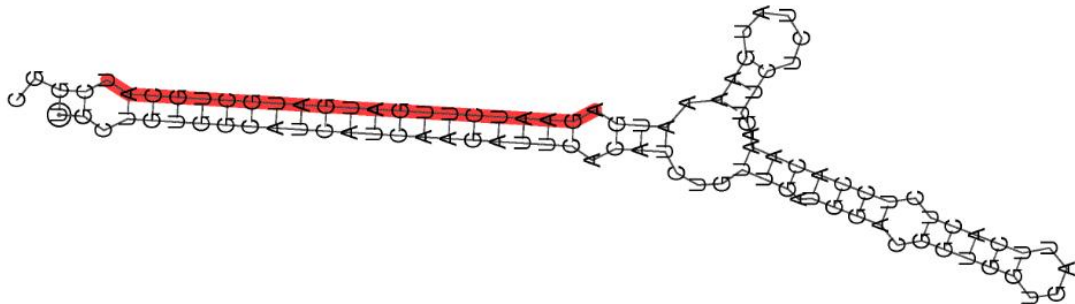

miR172c

AGCUACUGUUCGCGUGUUGGAGCAUCAUCAAGAUUCACAAAUCAUCAAGUAUUCGU  
GUAAAUAACCCAUUUUAUGAUUAGAUUUUUGAUGUAUGUAUG **AGAAUCUUGAUGA**  
**UGCUGCAG** CUGCAAUCAGUGGCU

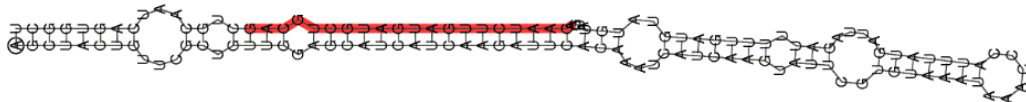

miR172e

GUAGUCGCAGAUGCAGCACCAUUAAGAUUCACAAGAGAUGGGUCCCUUUGCUU  
UCGCCUCUCGAUCCGCAGAAAAGGGUCCCUUAUCGAGUG **GGAAUCUUGAUGAUGC**  
**UGCAU** CAGCAAUAC

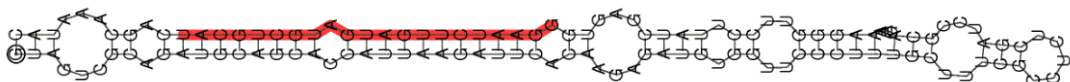



miR319a

AGAGAGAGCUUCCUUGAGUCCAUUCACAGGUCGUGAUUUGAUUCAAUUAGCUUCC  
GACUCAUUCAUCCAAAUACCGAGUCGCCAAAUUCAAACUAGACUCGUUAAAUGA  
AUGAAUGAUGCGGUAGACAAAUUGGAUCAUUGAUUCUCUUUGA **UUGGACUGAAGG**  
**GAGCUCCU**CU

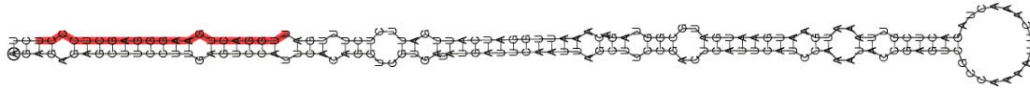

miR319c

UAGAUUAAGAAGGAGAUUCUUUCAGUCCAGUCAUGGAUAGAAAAAGAAGAGGGUA  
GAAUAUCUGCCGACUCAUCCAUCCAAACACUCGUGGUAGAGAAACGAUAAAUUU  
AAACCGCAGUGACUGUGUGAAUGAUGCGGGAGAUUUUUUGAUCCUUCUUUAUCU  
GUGU **UUGGACUGAAGGGAGCUCCU**CUUUUUCUA

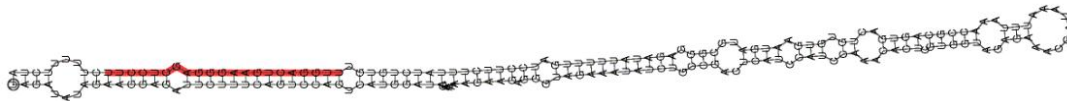

miR390a-3p

GUAGAGAAGAAUCUGUAAAGCUCAGGAGGGAUAGCGCCAUGAUGAUCACAUUCGU  
UAUCUAUUUUUUGG **CGCUAUCCAUCCUGAGUUUCA**UUGGCUCUUCUACUAC

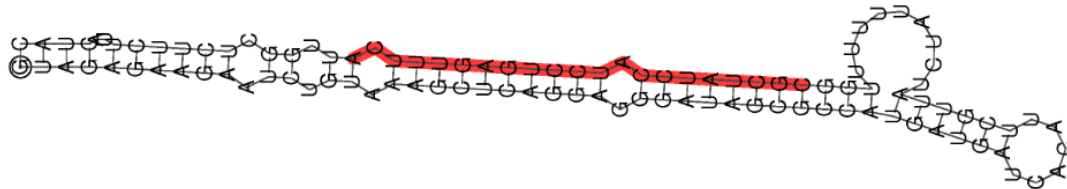

miR390a-5p

GUAGAGAAGAAUCUGUA **AAGCUCAGGAGGGAUAGCGCC**AUGAUGAUCACAUUCGU  
UAUCUAUUUUUUGGCGCUAUCCAUCCUGAGUUUCAUUGGCUCUUCUACUAC

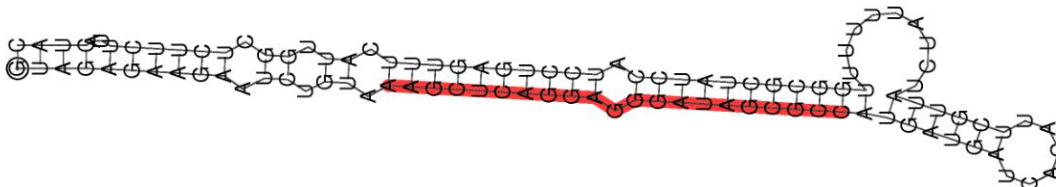

miR390b-3p

GAGAAUAGCUAUAAAGCUCAGGAGGGAUAGCGCCAUGGCUCACCAGUGCUGUAU  
GUUUUGUAUAUGCGUACAUGUAUAUCUGUUGG **CGCUAUCCAUCCUGAGUUCC**AUA  
GCUUCUUCU

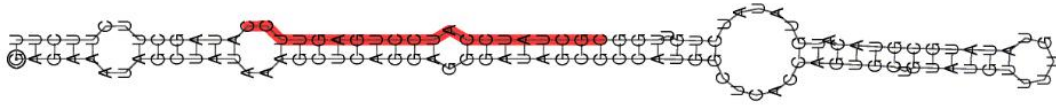

miR393a-5p

AGAGGAAGGA **UCCAAAGGGAUCGCAUUGAUCC**UAAUUAAGGUGAAUUCUCCCCAU  
 AUUUUCUUUAUAAUUGGCAAUA AAAUCACAAAAAUUUGCUUGGUUUUGGAUCAUG  
 CUAUCUCUUUGGAUUCAUCCUUC

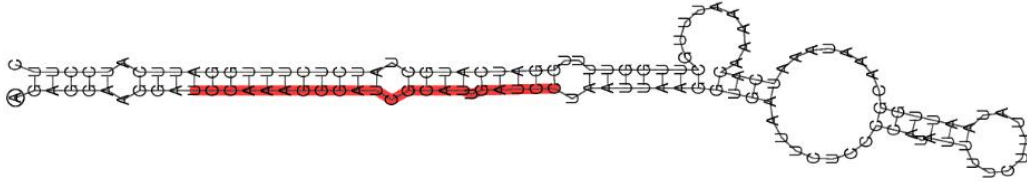

miR394a

CUUACAGUCAUCU **UUGGCAUUCUGUCCACCUC**UUCUAUACAUAUAUGCAUGUGU  
 AUAUAUAUAUGCGUUUCGUGUGAAAGAAGGAGGUGGGUAUACUGCCAAUAGAGAU  
 CUGUUAG

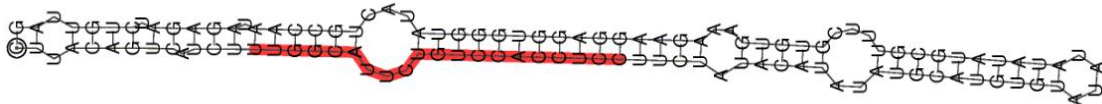

miR396a-3p

CUCUGUAUUCUCCACAGCUUUCUUGAACUGCAAACUUCUUCAGAUUUUUUUUU  
 UUUUCUUUUGAU AUCUCUACGCAUAAAAUAGUGAUUUUCUUCAUAUCUCUGCUC  
 GAUUGAUUUGCG **GUUCAAUAAAGCUGUGGGAAG**AUACAGAC

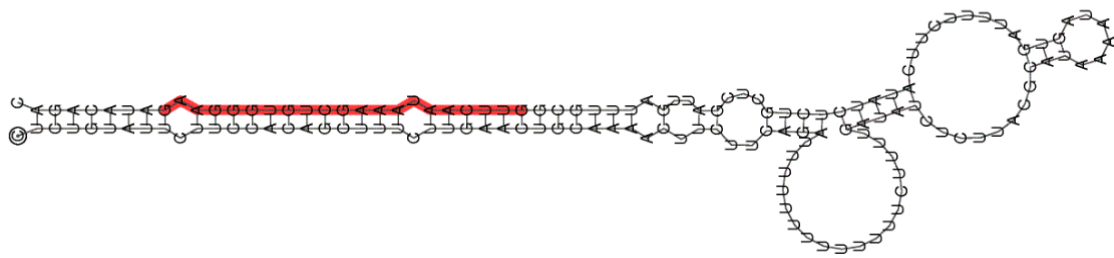

miR396a-5p

CUCUGUAUUC **UCCACAGCUUUCUUGAACUG**CAAACUUCUUCAGAUUUUUUUUU  
 UUUUCUUUUGAU AUCUCUACGCAUAAAAUAGUGAUUUUCUUCAUAUCUCUGCUC  
 GAUUGAUUUGCGGUUCAAUAAAGCUGUGGGAAGAUACAGAC

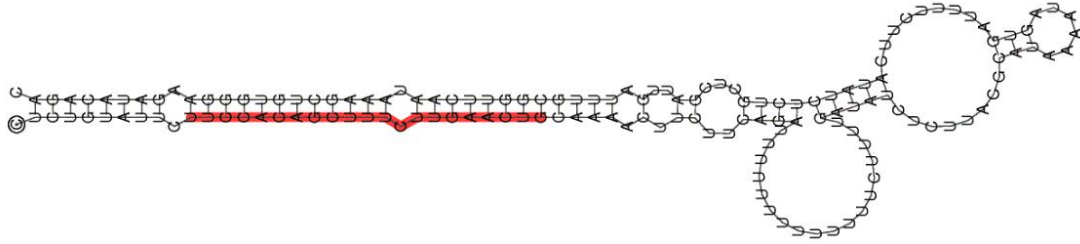

miR396b-3p

GGUCAUACUUUCCACAGCUUUCUUGAACUUUCUUUUUCAUUUCCAUUGUUUUUU  
 UCUUAAAACAAAAGUAAGAAGAAAAAAAACUUUAAGAUUAAGCAUUUUGGAA **GCUC**  
**AAGAAAGCUGUGGAAA**ACAUGACA

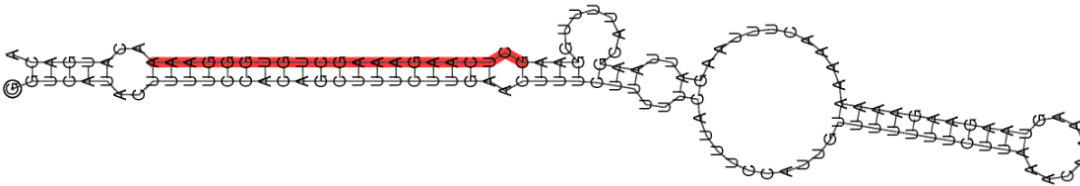

miR396b-5p

GGUCAUACUU **UCCACAGCUUUCUUGAACUU**UCUUUUUCAUUUCCAUUGUUUUUU  
 UCUUAAAACAAAAGUAAGAAGAAAAAAAACUUUAAGAUUAAGCAUUUUGGAAGCUC  
 AAGAAAGCUGUGGAAAACAUGACA

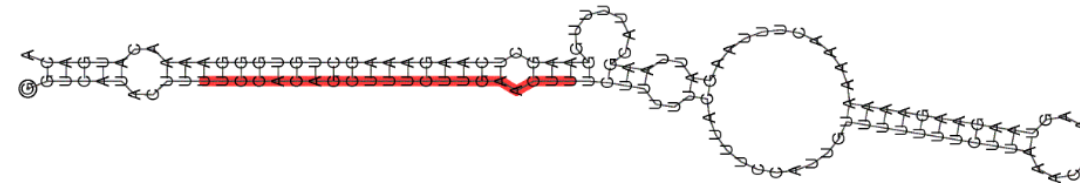

miR397a

UGAAUGAACAU **UCAUUGAGUGCAGCGUUGAUG**UAAUUUCGUUUUGUUUUUCAUUGU  
 UGAAUGGAUUAAAAGAAUUUAUACCAGCGUUGC GCUCUCAAUUAUGUUUUUCUA

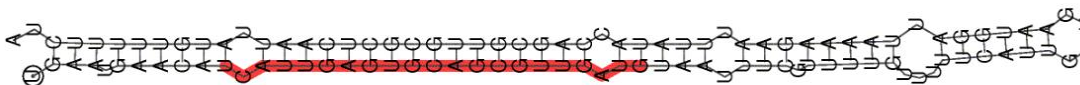

miR398a-3p

UGAAAUUCAAAGGAGUGGCAUGUGAACACAUAUCCUAUGGUUUCUCAA AUUUC  
 CAUUGAAACCAUUGAGUUU **UGUGUUCUCAGGUCACCCUU**UGAAUCUCCC

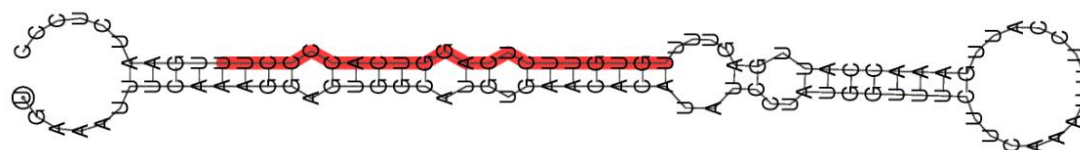

miR398b-3p

UGGAUCUCGACAGGGUUGAUUAGAGAACACACGAGUAAUCAACGGCUGUAAUGAC  
GCUACGUCAUUGUUACAGCUCUCGUUUUCA **UGUGUUCUCAGGUCACCCUC** GUGA  
GCUCUU

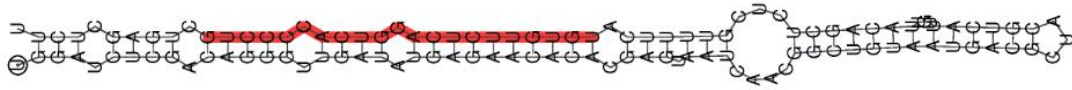

miR403-3p

UUGUCAUUAGAAGAGUCGUAUUACAUGUUUUGUGCUUGAAUCUAAUUCAACAGGC  
UUUAUGUAAGAGAUUCUUUAACAAUCCUAUAAUCUUUGUUGUUGGA **UUAGA**  
**UUCACGCACAAACUCG** UAAUCUGUCUUU

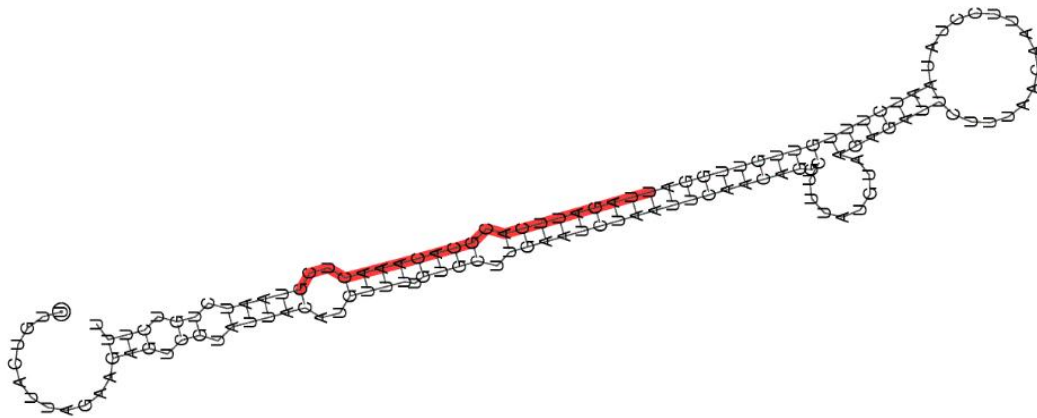

miR408-3p

AAGGUUAGAUUGGUAUUGCAAUGAAAGAAGACAAAGCGGUAAUGAGAGAGAGACA  
GGGAACAAGCAGAGCAUGGAUUGAGUUUACUAAAACAUUAAACGACUCUGUUUUG  
UCUCUACCC **AUGCACUGCCUCUCCCGGC** UCCUCUUUUUUUCUCUAUAAUUCUC  
UCUCUCCUUUCAUUUCACAGCUUCAAUGGAAUUUUAUUGCUCACUGCUAACG

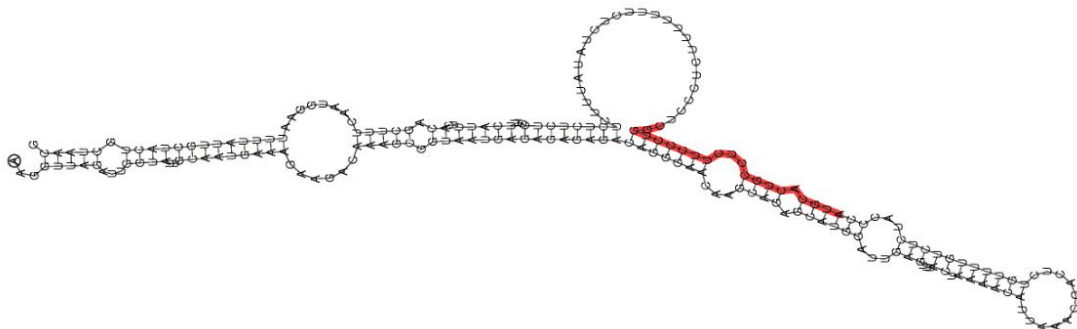

miR845a

AGAUAAAGGGAUUGCACGAUUUCUCAAUAGUUCGUCGUCGUGUUCUACACGUC  
GAUUGCUGUCAGAGCCACGCCUAUGAAGAAUUUGUG **CGGCUCUGAUACCAAUUGA**  
**UG** CUAUGGAAACAUCGAUUAUGCCUGAUUCCGUGUUUCCUUUUACCUUGUUGU

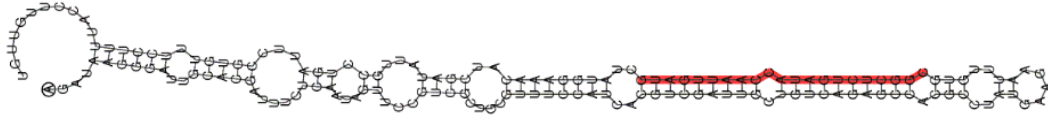

miR2111a-5p

CGAUGAUGAGUAUUGGUGAGGACCGGG **UAAUCUGCAUCCUGAGGUUUA** AAGCUUA  
 AUUUACGCAGGAAAUUUGUAUACGCAUAUACGUAUGUGUAUUAGUAUACCUUUUA  
 GUCCUCGGGAUGCGGAUUACCUCGUUCUACUACAAUACACGUACUCG

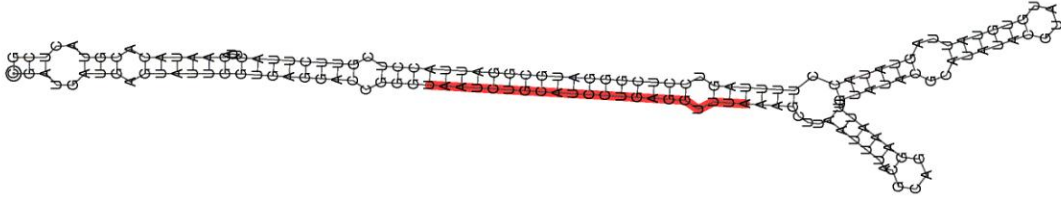

miR8175

CUUAAGGCAAUUUGACCUAUAUCAAAUUUGGCACCGUUGCCGGGGAUCGACCCGG  
 GUCACCCGCGUGACAGGCGGGAAUACUACCACUAGUACAACGACCCAAUUAUAG  
 UGGUAAGUAUUCUCGCAUGUCACUCGGGUUC **GAUCCCCGGCAACGGCGCCA** AAUU  
 UGAUAUAGCUCAAAUCGCCUUAAG

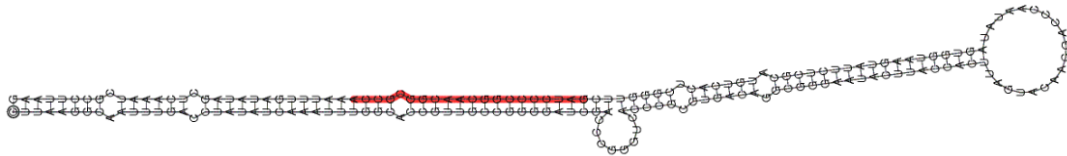

Supplement: 12864_2017_4180_MOESM5_ESM.pdf [file 12864_2017_4180_MOESM5_ESM.pdf]
