# Supplementary material for: miRNAs involved in the development and differentiation of fertile and sterile flowers in Viburnum macrocephalum f. keteleeri
Source: PubMed Central journal article supplement (PMC5640959; doi:10.1186/s12864-017-4180-x), 2017-10-13

**Additional file 8.** Fold-back structures for novel miRNA from *Viburnum macrocephalum* f. *keteleeri*. Precursor sequences for novel miRNAs were shown in black letters with miRNA sequences highlighted in red. Precursor secondary structures and MEF value were produced using the MFOLD (<http://mfold.bioinfo.rpi.edu/>) software. Precursor sequences for novel miRNA\*s were shown in black letters with miRNA sequences highlighted in green.

novel\_1 MFE = -44.50 kcal/mol

**GGAAUGUUGUCUGGCUCGAGG** ACCCUUUACUGCUUUAUCAAUUUUCUGAACAG  
AUCUAUUUAUGAAAAUAUACAUAUCAUGCAGUACAUAUAUAUAUAUUUCG  
UUUGUCAUGGUUUAGUGUUG **UCGGACCAGGCCUUCAUUC**CU

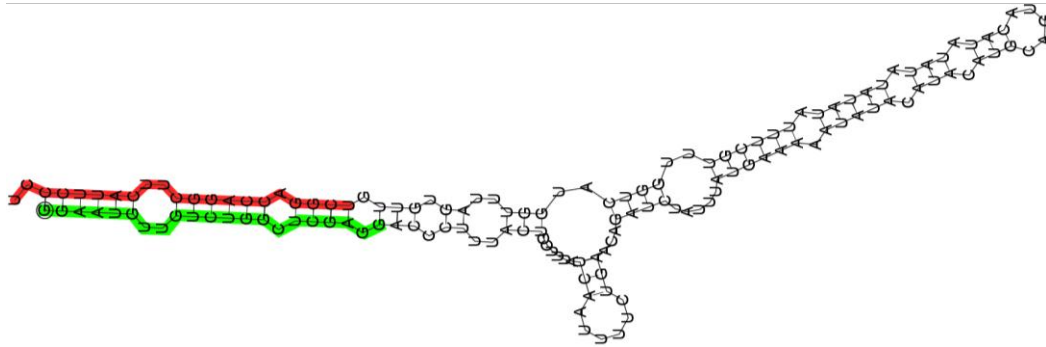

novel\_10 MFE = -34.60 kcal/mol

**GGUAUGGUGGGCUUGGGGAGG** AAAGUAUUUAUAUAAAAUAAAACCC **JUUCC**  
**AAGACCCCCCAUACCGU**

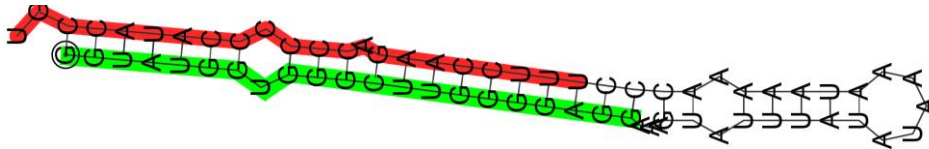

novel\_100 MFE = -32.90 kcal/mol

GGUGAUGGAGGUUCUAAAACCUAGAAUCAAUUCGCGGGGUGGGGAGAGGGUAG  
GACGAUUCUGACUUGUUCAUAAACGG **JUUGAGAACCUCUGUCAACGC**

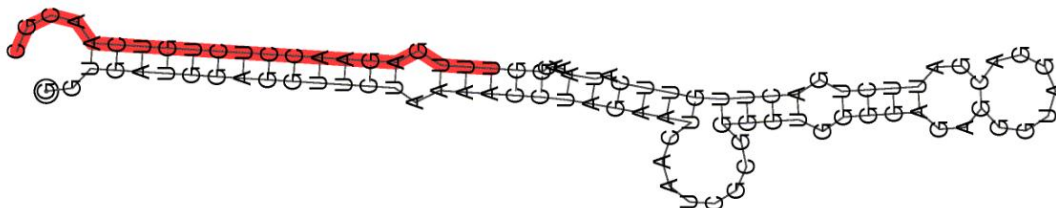

novel\_102 MFE = -35.70 kcal/mol

**UUUUUAUUAGACUUUGGUACU**UCUUUAGUCACUGAUGAUUAAAAUUGUCACU  
AAAGUAACGUUCAGUGUCAUUCAGUGACAAAAAUGAACGAAAGUCUAAUAA  
AAAAU

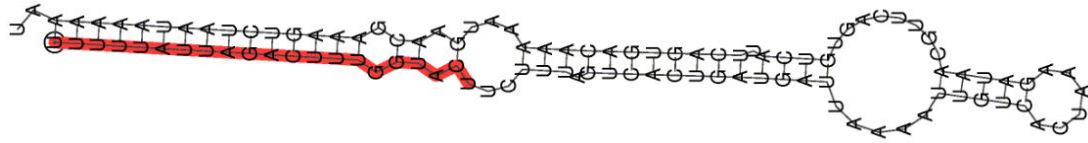

novel\_103 MFE = -50.70 kcal/mol

AGUAAUUCUACGCUGGCCUUUUGACAGAGACUCGCUAAUAUGACAAUAAACUAU  
AGAAGCAACUAAGUCGUGGACCAAACACCAAUCACUGCAGUGUUGUUAUGUUA  
UCGAGUCCUUUGUU**UCAGUGUAGAAUUACUCU**

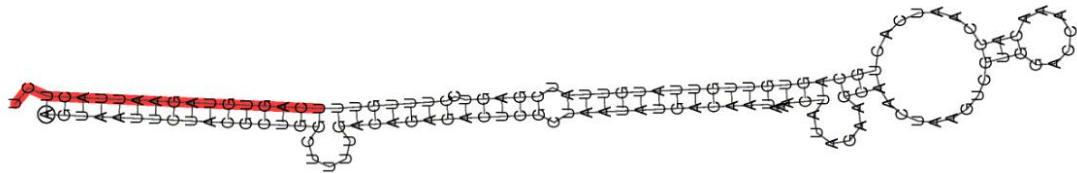

novel\_105 MFE = -23.60 kcal/mol

**ACUGGUGCAGUGUAGUGUCUGGCC**CGUAUGUUUUCAUCAUAAGAAACAGAUUC  
UACGGCUACGUGACACAUGUUACACCCGUGU

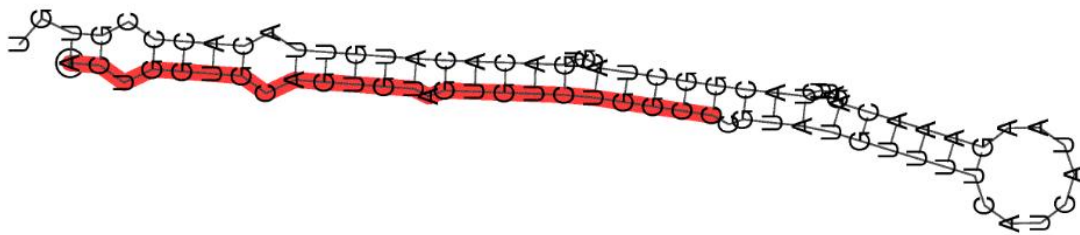

novel\_107 MFE = -12.00 kcal/mol

AUAGUUGAAGAAUAGAUCUGCACCAUUGAAGAU**AGAUCUGUCGUCAAUUUUG**  
**C**

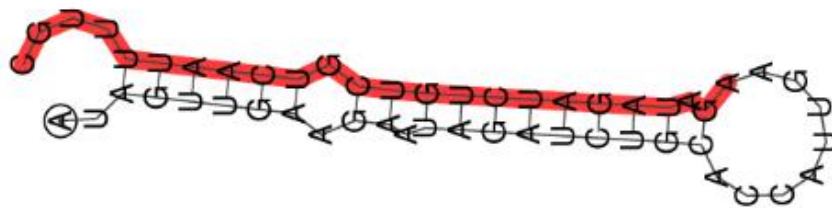

novel\_108 MFE = -36.00 kcal/mol

**CAUCAAUGGACAUGUGAUACAGAUGAGA**UUACAGACCCAACUUAUAAUCAAU  
CAUGAGGAAAAGAAUAUGAUUUUGGGAUUUUGUAUUACACCCGAG **UCGUGUG**  
**UCUAUUGAAUGUGAAGU**

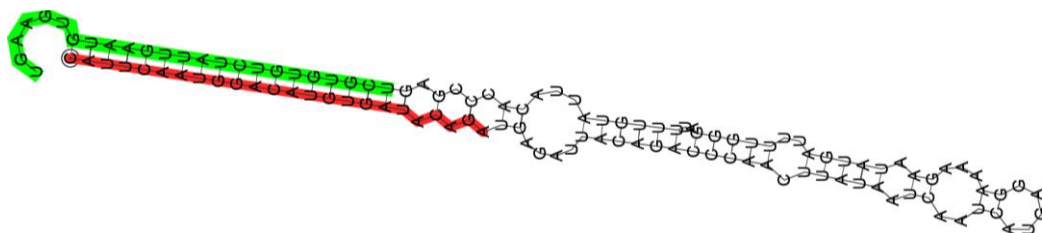

novel\_110 MFE = -48.29 kcal/mol

**UUAAGAUCUGUCCAAGUGAUG**GAGUCUACGUCAUAAUUUGUGUCAGAGGGGG  
CCUGCGUUCGCGCGGCCCUACUCAAUAAUAAUUCAAUGUUCGUGGUCUAG  
GCAAUUAUAUCUCCUUCAUUUGGAAGGACUUAUG

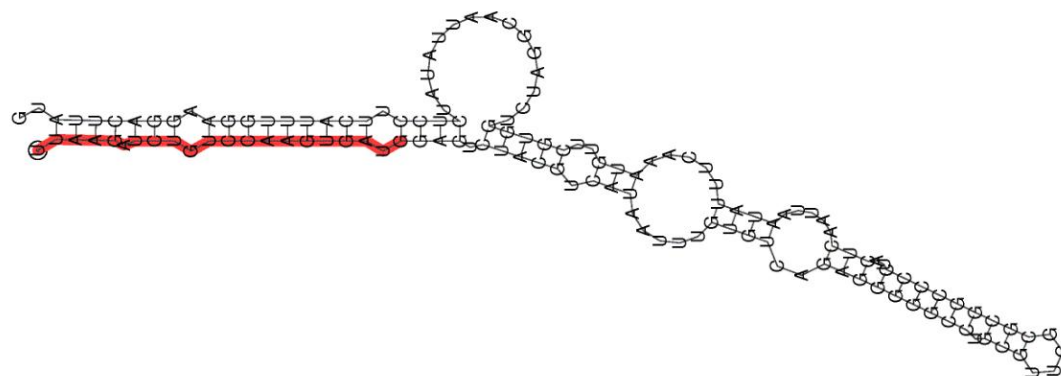

novel\_112 MFE = -36.10 kcal/mol

**UUGGAUCUUGGAAAGUAUAGA**GGAAAUGCGAAGGAGAGGGAAAAUAAGUA  
UUUUUUGUAGCAUGUUUUUUUCCCUUCAUUUAGUCUUUCCCUAUACAAUCUG  
AGAACAAC

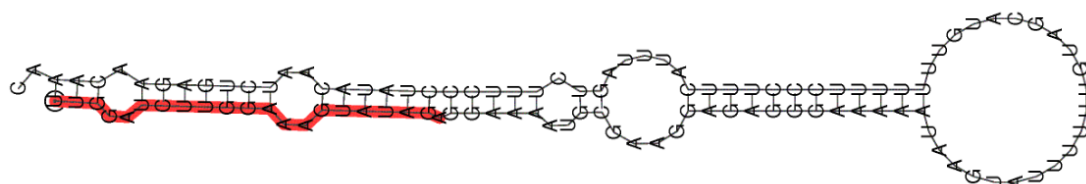

novel\_13 MFE = -29.13 kcal/mol

**GGAAUGGGAGCGUGGGAAAGA**AAAUUACGAGGGAAAAUGA**UUUCUUCCUAC**  
**ACCCCCAUUCCGC**

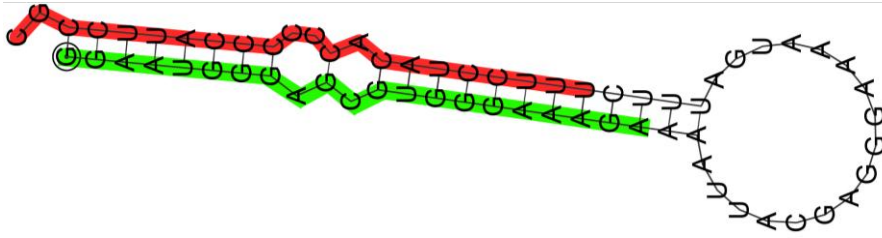

novel\_14 MFE = -38.43 kcal/mol

**UCCACAGCUUCUUGAACUU**CUUCUAUCUUA AUCUAAUAAUCUCUUGAAUAC  
UCCGCAUAGAAGAAG**CUCGAGAAAGCUGUGGGAAA**

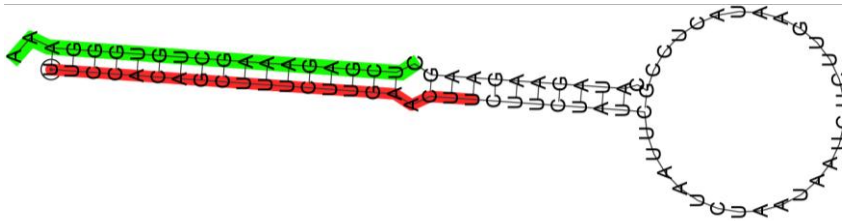

novel\_16 MFE = -42.30 kcal/mol

**AGCUUGUGCGUGAAUCUAACC**UCAUCACAUCACAGCCAUCCAUUCUUCUGUU  
CACUCCAGAUCUCGAGGCAUGGCCAAUCAGAUCCGGUGAUA**UUAGAUUCACGC**  
**ACAAACUCG**

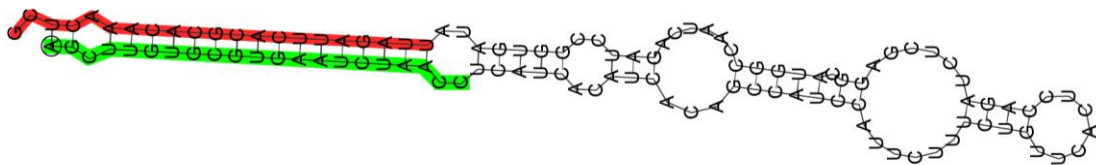

novel\_17 MFE = -27.30 kcal/mol

**GGAGCGACAUGAGACCACAUC**AAUCCUCAUUAAGUAGGUGUUUA**UGUGUUCU**  
**CAGGUCGCCCCUG**

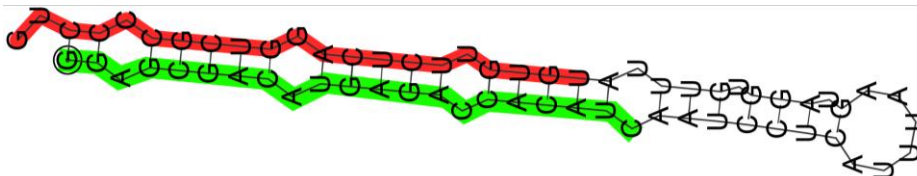

novel\_19 MFE = -35.30 kcal/mol

GGAAGUGGGAGGAUUGGCAAGG GAAAAUAAAACUCUCUGUUUGGUACUCC UUG  
CCCAUCCUCCCAUUC CGC

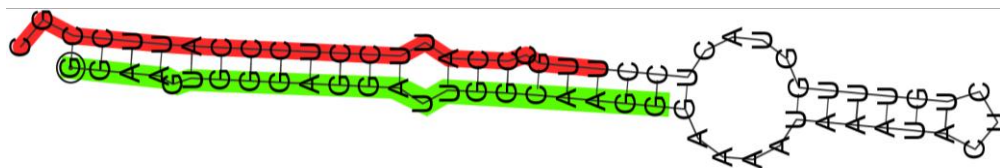

novel\_20 MFE = -33.60 kcal/mol

ACGUUAUCCUCUCCAUAUA UUAUCACGGUCUCUAGUAUGGCUCCAAAAGC  
UAUCAUCAUAAAUA UUAUGGAGAGGAACAAUGUUG

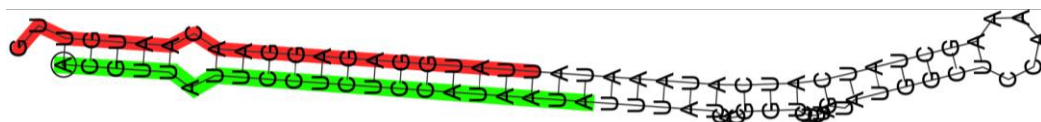

novel\_23 MFE = -32.70 kcal/mol

UUAUACAGAGAAAUCACGGUCG CUCGAGUUCUUCCUCUCUCG ACCGGGUUUC  
UCUGUAUAAAG

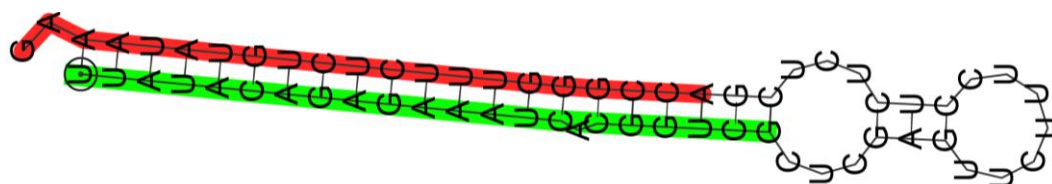

novel\_24 MFE = -41.00 kcal/mol

AGUCAUGGGAGGUCUUGGUGGUGGGUUGGCAGUGACCGUGUUAACGUUAGGA  
GACGAGCUGGCAGCGGCCUUCUUGGCAGUGAACUGAUUUGGCGUUCUCUAGC  
UUC UCCACAGCUUUCUUGGACUC

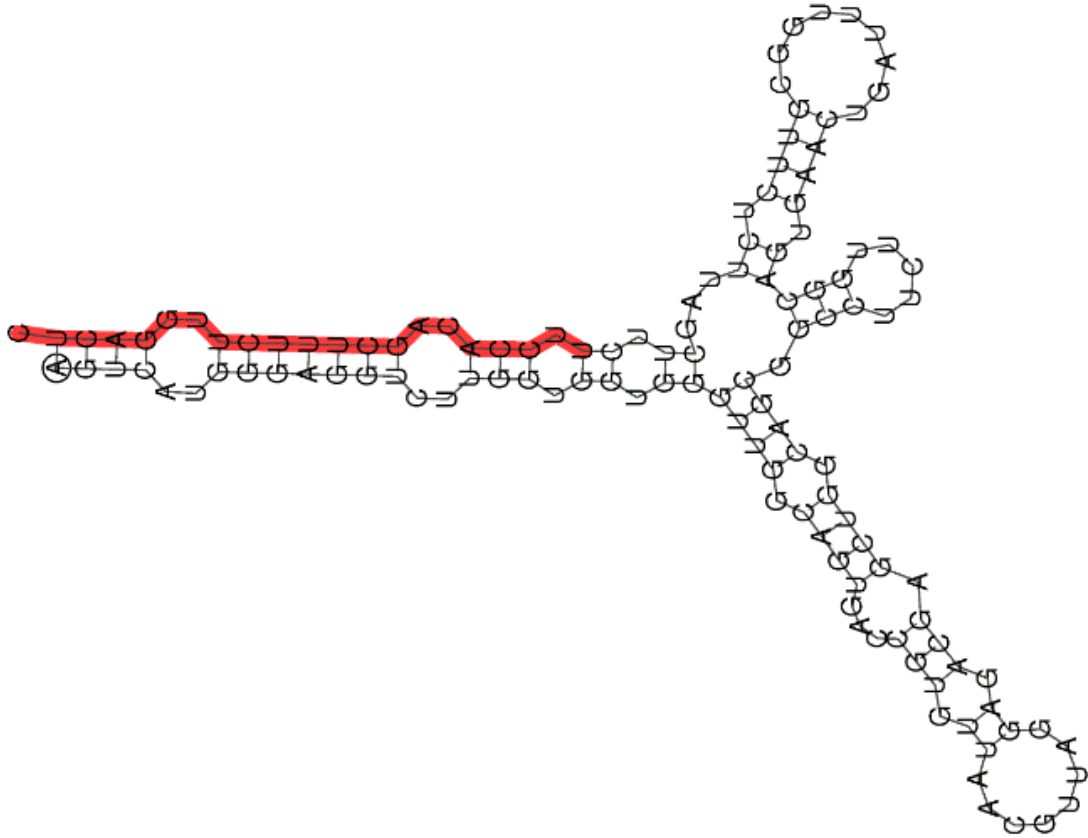

novel\_25 MFE = -54.30 kcal/mol

**AGGCACUUUCCCAGUCGUCUCU**GCUAUUGUGGGUGAGACAUACACGCCGAUGUG  
 UGUGUGUAUAUAUGCCACCAUAUUCGUCACAG**AGACGACUUGGAAGUGCCAGA**

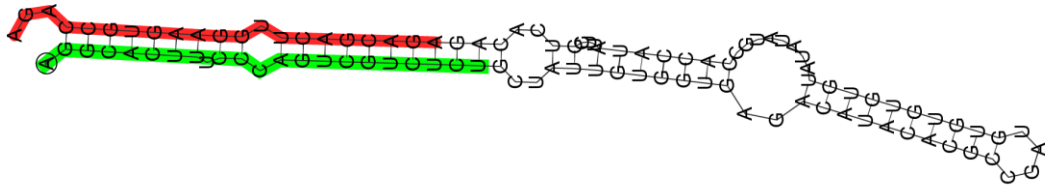

novel\_27 MFE = -36.00 kcal/mol

**CGUGGUAAUUGGUCCGGCUCAGC**UUCUUCUGUUGCAUAAAUAGUUAAGAGA**UG**  
**AGCCGAACCAUAUCACUC**

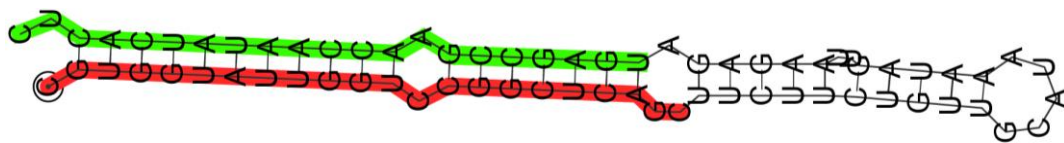

novel\_3 MFE = -76.54 kcal/mol

**GAGCUCCUUGAAGUCCAAUAG**AGGUUCUUGCUGGGAAGAUUAAGCUGCUGAU  
UUAUGGAUCCCUUAAGCCCUAUCCCAUCUUUAAUUAUGGAUAGGCUUAUGGC  
UUGCAUAUGUCAGGAGCUUUUAUUACCCAAGUUAGAUCUUGUUUGGA**UUGA**  
**AGGGAGCUCU**

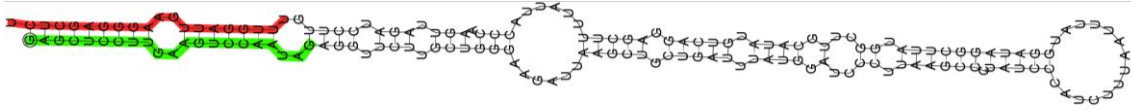

novel\_31 MFE = -30.70 kcal/mol

**UACAGAUGGGUAAUCGACAUUG**UGGCAACUACUGUUUCCAUAAGCCGUUGAA  
UCACA**UUGUCGAUAACCCCUUUGUAC**

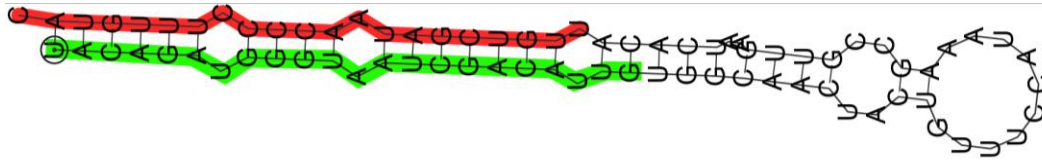

novel\_32 MFE = -22.20 kcal/mol

**AGUGCAUUGGACUAUUGUACCUUG**UCGGUUUUCGUAUCA**AUGUACAAUACU**  
**UCAAUGCAUUUG**

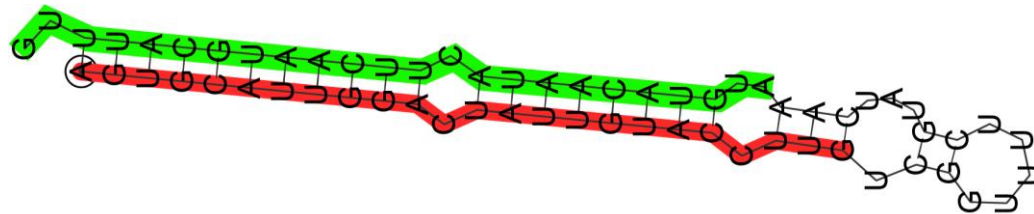

novel\_37 MFE = -71.70 kcal/mol

**UCGCUUGGUGCAGGUCGGGAC**GGAUUCGCCGCGAGGUCAUUCCUUGUUGUU  
CAUGUGCAAACAUUAUGUACAUAUGCAUAUAUGUAUUUAUGUGUAUGUAUA  
UCAUGUACACGUGAUUUCGUUGUAGGUGAAUAUUGU**CCCGCCUUGCAUCAAUU**  
**GAAU**

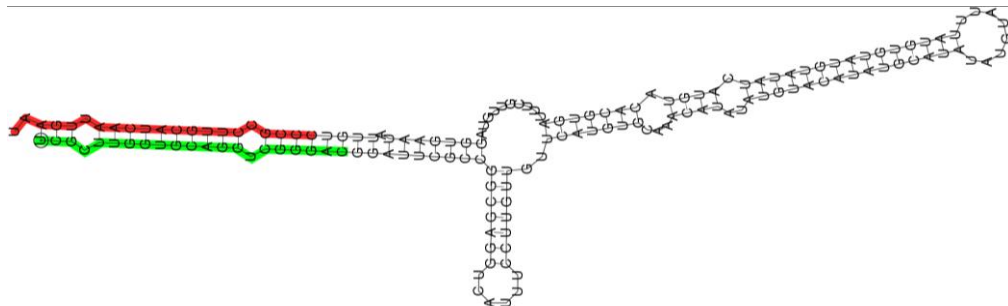

novel\_38 MFE = -32.00 kcal/mol

UUUUGUUGAUGGCAUCUAAUC AUCUUUGACACCUGACAUGGCAUUAUGG UU  
AGAUGAUC AUCAGCAAACA

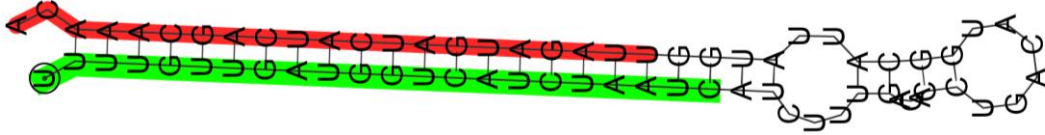

novel\_4 MFE = -32.60 kcal/mol

AUAGAUUAUUUCAGCGAAUU ACAGAUUAUAGAUUAAAUUGUAAAACUAUUA  
UAAUUUAACGUAUGAUUCAUAA UCGACUGAAAAUAAUCUAUUC

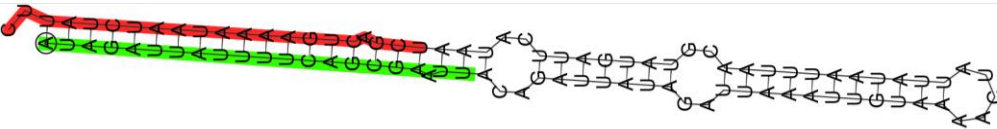

novel\_40 MFE = -32.90 kcal/mol

ACUCUCCCUCAAGGGCUUCUG UAUUAGCCUCUAUUAGAAGGUCAAGACU GAAG  
GUCUUGUGGGGAGAGUGG

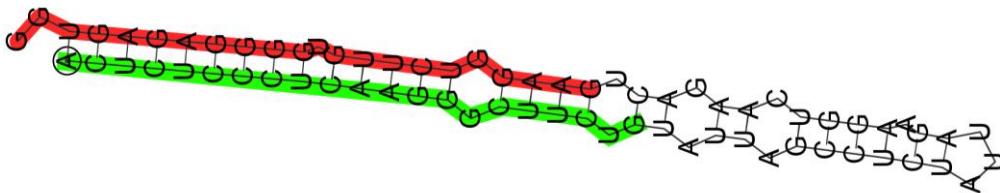

novel\_41 MFE = -26.44 kcal/mol

UGAAGCUGCCAGCAUGAUCUU AACCUCCCUACUUUGUUGAGGAAAGAUCA GAU  
CAUGUGGUUGCUUCACC

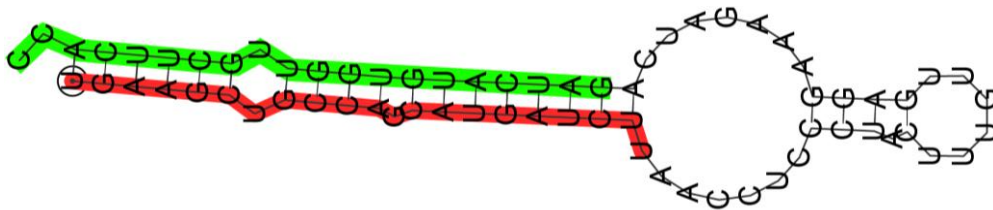



novel\_45 MFE = -26.50 kcal/mol

**UUUGAUACGCACCUGAAUCGG**GAAAACAUAUAUUUACAUCUAUGCUUUAUA  
UAAAUUUAUGUCGAUUUAGGUUCGUAUCGAAAUU

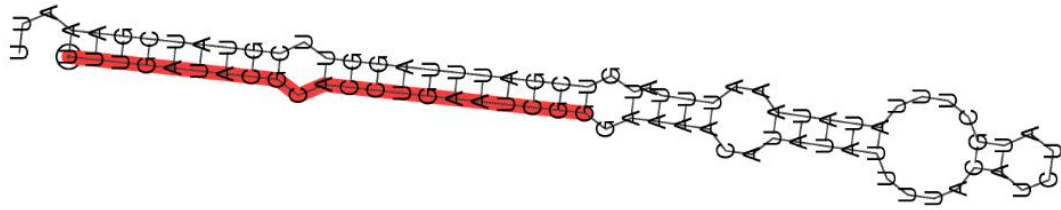

novel\_46 MFE = -47.80 kcal/mol

**UUUGGAUCUCGGAAGUAUAGU**GGGAAAUGAGGGAAAUGAAAAAUGUACUA  
AAAUGCGCAGUACAUAUGUAGCAUAUAUUUUUCCCUUUUUUGUGCAAUUUCC  
CU**CUAUACUUUCCAAGAUCCAAAC**

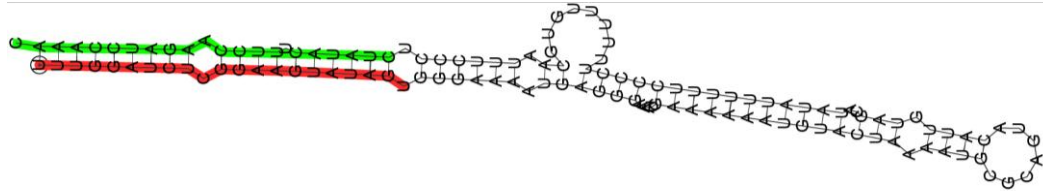

novel\_48 MFE = -91.50 kcal/mol

**UCAGUUCAGUCAAAAGGGCAGACUAU**CCACGAUUCGACUAGGCAAGUCACGGGA  
GACACUUGGGGCUGGCUAGAUUGUAGAUAUAGUGGCUUUUCAAUGGAAGCU  
GAAACUUUACAAAAAUAACACUUGGGCUAGACGGGUGGAGUUGGUAUGC  
CCCGUGAAUCCCCUAGUCUCUGCGUGGAUAGU**UUGUCCUUGACGGACUGAAG**

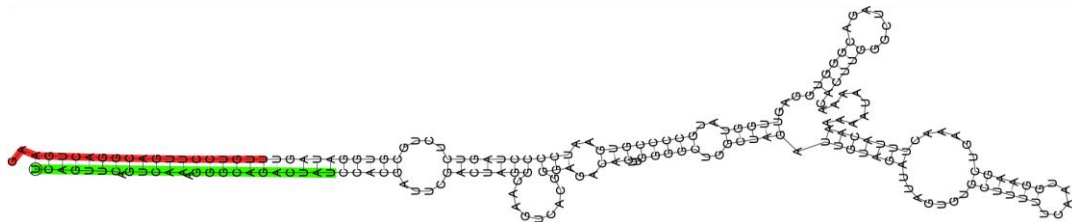

novel\_50 MFE = -59.30 kcal/mol

**GGAGCAUCAUCAAGAUUCACA**GAGCUAUCUAGGGUUUCAUGGAGAGGGGUAG  
UUUGGAAUGAUAGUGCCUUUUUGGUCUCUUUACCCUUUACUCCCUCUGGCC  
UUUGAU AUG**GGAAUCUUGAUGAUGCUGCAG**

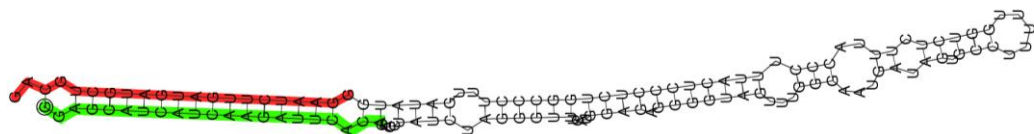

novel\_52 MFE = -41.80 kcal/mol

ACGUGGUACUUCAGGACCAAUAAACAAACAACAUUCAUAUGAUGUCCCCCUA  
UUUGCAGGGUAACCACUACCCACUACUACCACAACAUCUUUUU **AUUGGUUCU**  
**GGAGUACCACCUGGC**

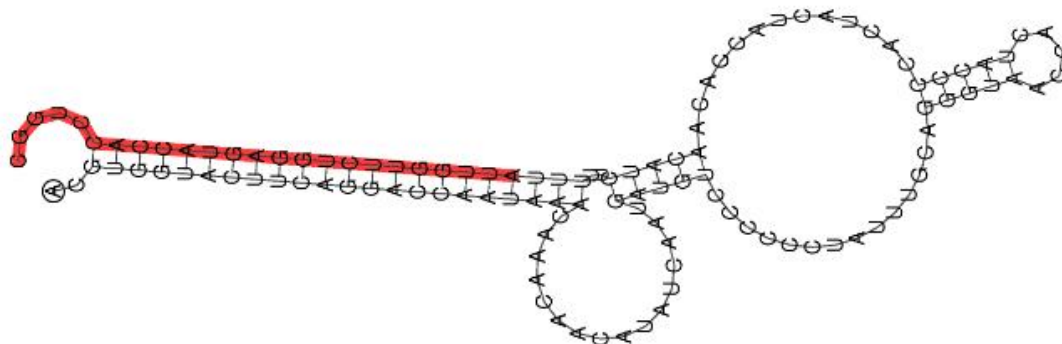

novel\_53 MFE = -54.10 kcal/mol

**UUUGGAUCUUGGAAAGUAU**AGUGGAAAAGGUGAGGGAAAGGAAAAAAUGUA  
UUAAAAAGUAAAAUAACUUUUAGGGUAUUGUUUUUCCCUUCCUUCACGGAA  
UUCUUUGUA **UUUUCUGAGAUCCAAACAU**

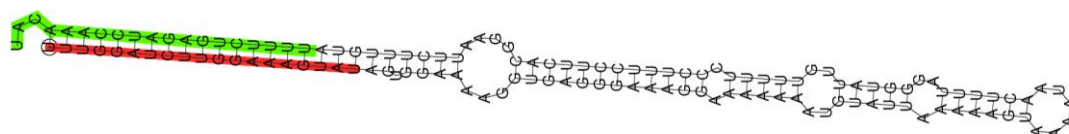

novel\_55 MFE = -61.30 kcal/mol

**AACUGACAUUUUUAUCUGACC**CACUGAGUUUUCAGCAGUGCAUUGGUCGGUGA  
CUUGGUGUUUUAGUAGACCCAUGUGGACCCAACACGUUAACCAAUACAUUGC  
UGACAACUAGCGGG **UCAGAUUAAAAUGUCAAUUUU**

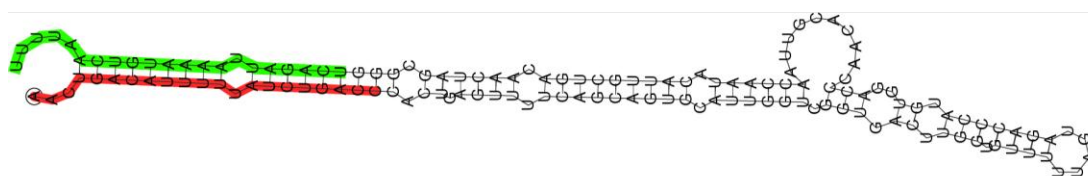

novel\_57 MFE = -74.60 kcal/mol

**UGAUCUUCACUCCAACAAGCU**UUUGGACAUUUAGGGACAAAACAUGGUCUC  
UCCAUCUGAUUCAAUUGGAAAGUUGAAGCAGUGGAAACAAAGAUGGGGUCAA  
UAACAAAGAAAGGGCUACAACAAUACAUUUUGCAGCUUCAGUAACAUCAUUG  
AGAACUAAGGAGACGUAAAUAUCCCCGAAAG **CUUGUUGGAGUGAAGAUGAAG**

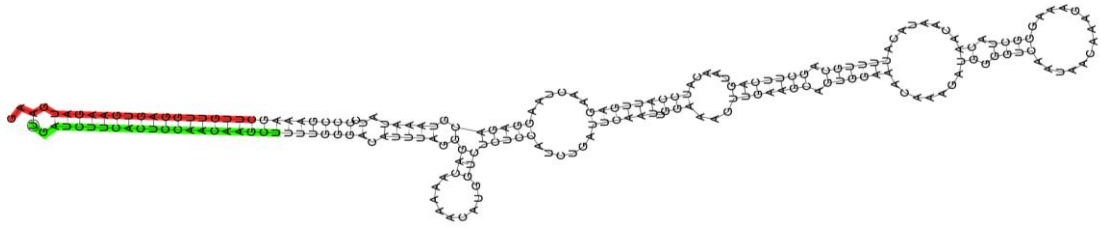

novel\_59 MFE = -52.80 kcal/mol

UUAGUUCACGAGUCUGAAGCUCUGUUUUGUGAAUGAACACAGAACAGAGCUU  
 ACACAGAACAGAG **CUUCGGACUCGUGAACUAAAG**

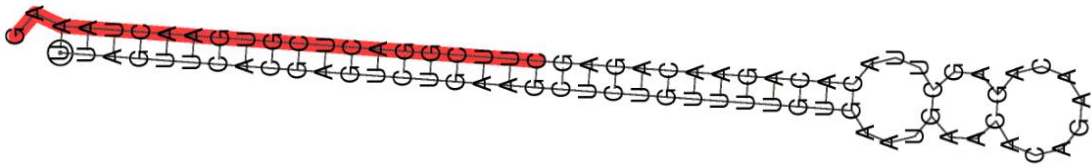

novel\_6 MFE = -35.60 kcal/mol

**GGGAUGUUGUCUGGCUCGACG**CAUUCACUGUACUUUUCUAGAGAGAGAAAGU  
 GAAGGUA **UCGGACCAGGCUUCAUCCUC**

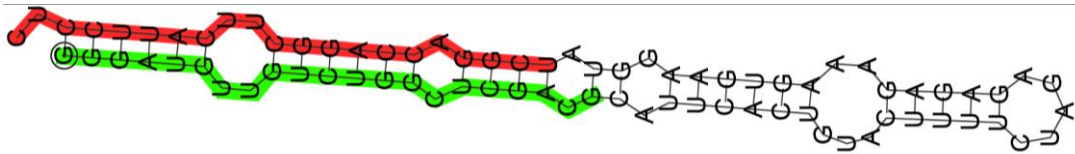

novel\_60 MFE = -56.10 kcal/mol

**AAGCUCAGGAGGGAUAGCCCC**AAUGGAUGACAAUAUUA AUGGCGGGCGGGCGGU  
 GGCUGUCAAGACAGUGUGGGUGUGUUCUAACAUCGUCCGCAG **GGCUAUCCAUC**  
**CUGAGUUUA**

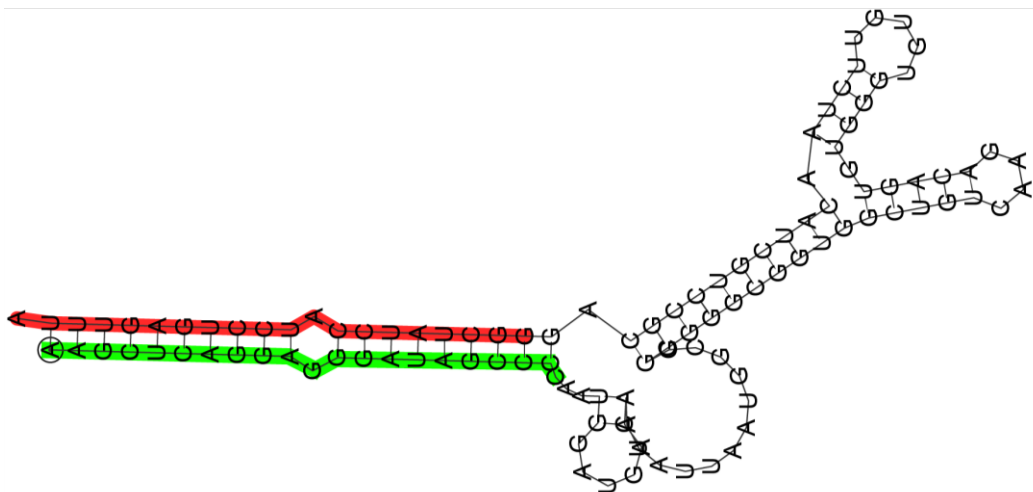

novel\_61 MFE = -32.20 kcal/mol

**ACCGGAUGAUGUCAACAGUUGG**AUUAGAUGUAACCAUUGGAUGGGGAUCUAC  
ACAUAUCC**AACGGCUGACGACAUUUGGUC**

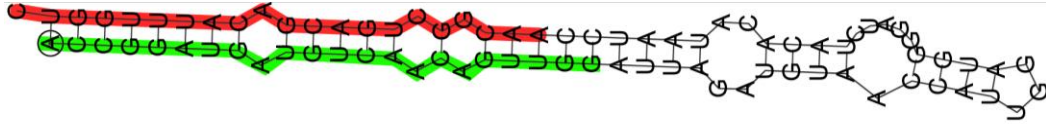

novel\_62 MFE = -51.04 kcal/mol

**CAAUAAUGCUAGACACACAUAUGA**UGCACAAAAAAUAGUACACAAAAUGAU  
GCGUCAGGUCAGAAUUGAGUUCUACCUCAUUAACCUUGUCAUAAAUUCACUA  
ACACACAAUGUAGCUUACUAAGUUUUUGUGUACC**UUUUGUUUGUCUAGCAUU**  
**AUUGAA**

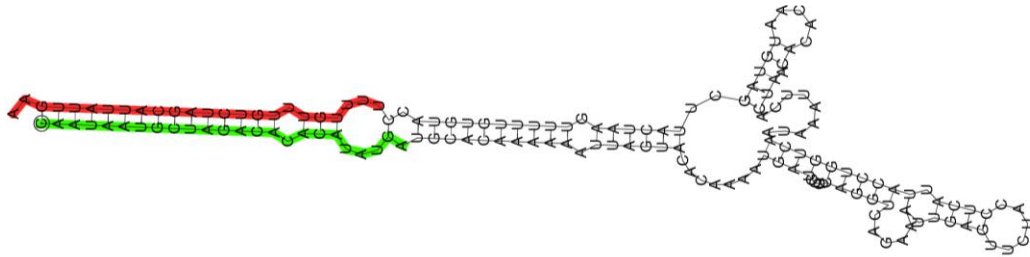

novel\_64 MFE = -27.65 kcal/mol

CAUUUUACUUUUAGCAACACUUUGACGAUUUUUUGCGACAUUUUUUUUUCAC  
AGA**AGUGUCGCUAAAAGUGAAAAUGGA**

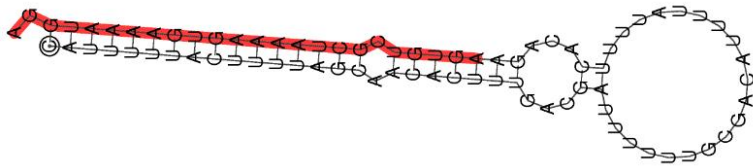

novel\_65 MFE = -86.60 kcal/mol

**CAAGAAACCCUCCUGAAU**GAUUUUUAAUGCAAAAAAGCCCUUGUACUAUGCAU  
UUUGUUGCUAAGACAUCCCUAGGUGUUGC UAAAAGUCUCCAUAAGGAGGUUU  
UUGCGACAAAUGCAUGGUUCAAGGGCUUUUUUGCUUAAAAAUAGUUCAAG  
GGGUUUUUUUGCA

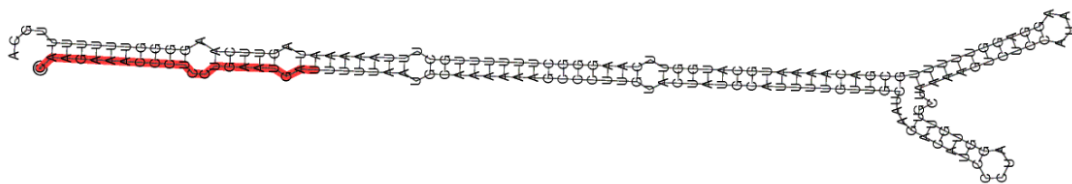

novel\_66 MFE = -86.60 kcal/mol

AAAAAUGGGACUCGCGAAGUGGC AUUAAUGAUGUGUUGGUUGGUGUUUUA  
AGAUAGACAACAGACUCUACACACUAACCAAUGCUUUGGUGCCACAUCAACGA  
GUGUCAUUUUUG

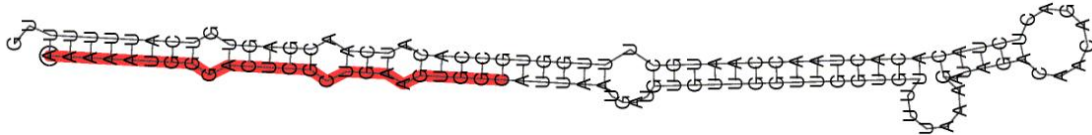

novel\_67 MFE = -101.50 kcal/mol

ACCGAACAGCUGCGGAGAUAAGC CAAAGCCCUGAU AAGAAACAAGGCAUGACA  
UAGGAUGGUGGCACAUAGCAUAGCAUUAUCCAAGAGGGGCCAUACCAGUAAUA  
UGGCGUGACACCAUCCCAUGGCAUGACUAGAGCUUCUUAUUAAGGUCUUGUUC  
CUUAUCAGGGCUUUAUUAUCUCUGCAGCUGUUCGAUUAUGCGC

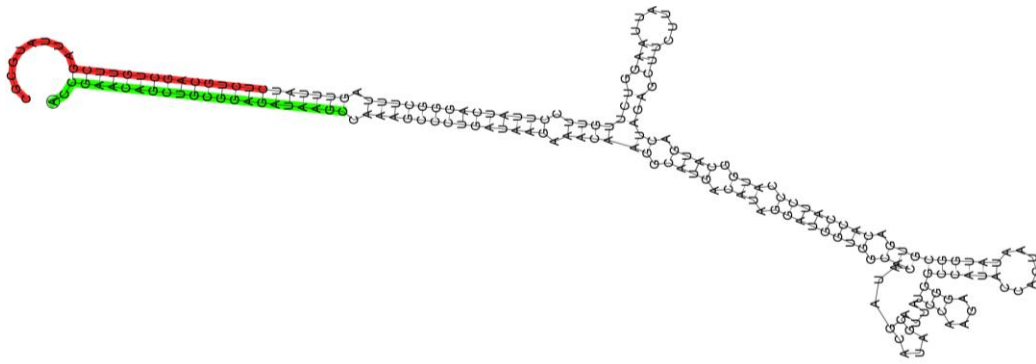

novel\_68 MFE = -82.30 kcal/mol

GAGCUUCCUUCAGUCCACU CAUGGAUGAGGAAAGGGUUGAAUAGCUGCCGA  
CUCAUUCAUUUAACCACUCAGUAGAAAAGAGGAUAAGUUUUGUGCUACUGUG  
ACUGAGUGAAUGAUGCGGGAGAUAGUUGUCCAUCCUCUCCUCUGUGC UUGG  
ACUGAAGGGAGCUCCCUU

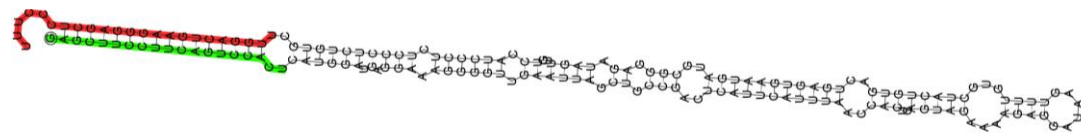

novel\_69 MFE = -41.10 kcal/mol

UGGUGGGCAGUGUCCGGCGGGU GGGCCUCCAUCCUGGGCCUCUCCGGCAAAC  
CCAC CGGCCGUCACUGCUCCUCACC

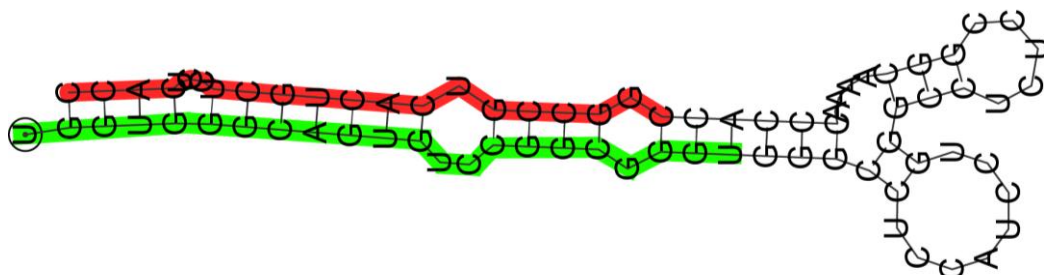

novel\_7 MFE = -37.70kcal/mol

AAAUGUCGUCUGGUUCGAGAU CUUCCGUGUGAAUCUUAAGAAUUCAUCAUCGG  
AAUGAUU UCGGACCAGGCUUCAUUC

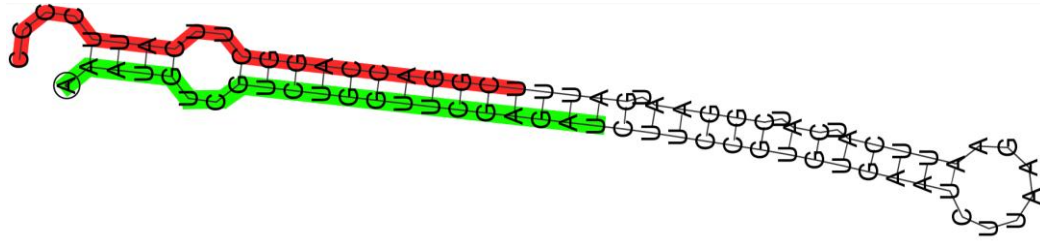

novel\_71 MFE = -70.20 kcal/mol

AGUAAUGCGAAACUACAAAAAAUGUUUAUAAAAAGUGUCCACAAACUGAU  
GUGGCAGACAUUUAUUGAUGAUUAUUGUGAGUCUUCUUUAAUGAUCAAUA  
AAUGUGGCCACAUGUGGAGUAUUUUUGUCAUAU UUUUUGUAAGUCUAGC  
AUUACUCU

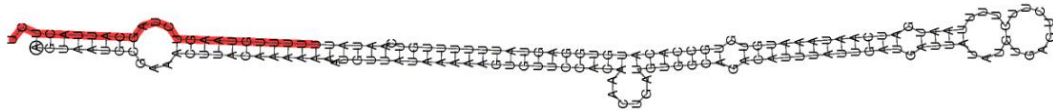

novel\_72 MFE = -28.60 kcal/mol

AUGGAUGCGUUGGCAAUACGAU GGUUAUUUUCUUGUGGAAAGGAAAAG  
AAAAGUAAUGGUG UUGCCGACACCACCCAUUC

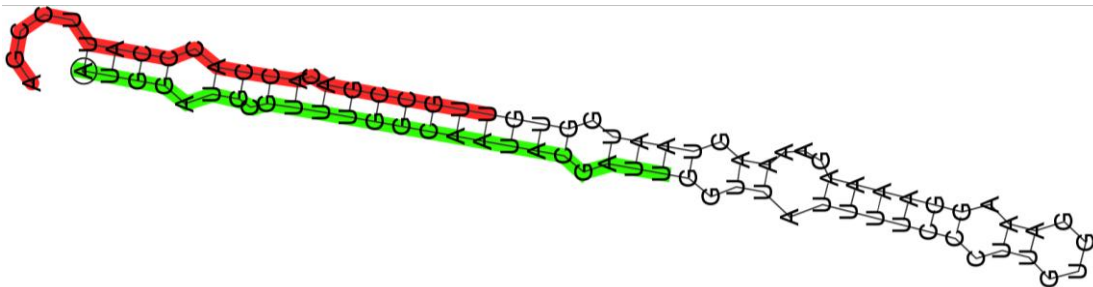

novel\_73 MFE = -12.40 kcal/mol

GAAGAGGCGUACAGUUCUUC AGACUGAGGGCUCUUC

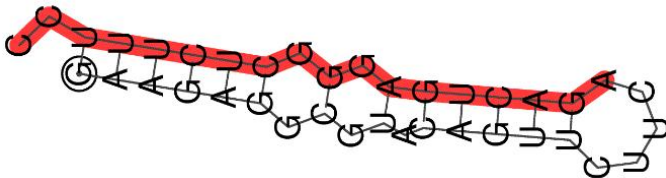

novel\_77 MFE = -26.20 kcal/mol

UUUGAGCCUCAAAAUAGUAAGAAC AAGGGUCUUGUACGAGUAUGUGCCCUAU  
UAAUUAUAUGUCGGAACUUGUUCUACUAAUUUAGAUUCUUAAC

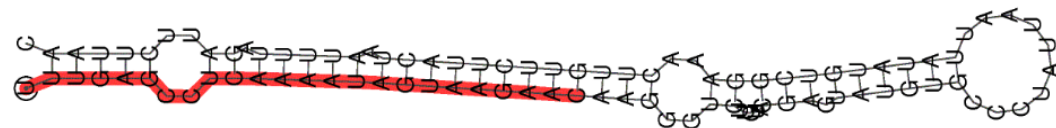

novel\_78 MFE = -47.11 kcal/mol

AGUUGCUCACAAAUGAUGUAGCAGUUGUUGUUAUUAGUUGAUCGGCAGUGG  
AGUGUAGCGCACUAACUGCCCAACAAUUUGUCACAUAU**UUUCGUGAGCAACUC**  
**UUUGUG**

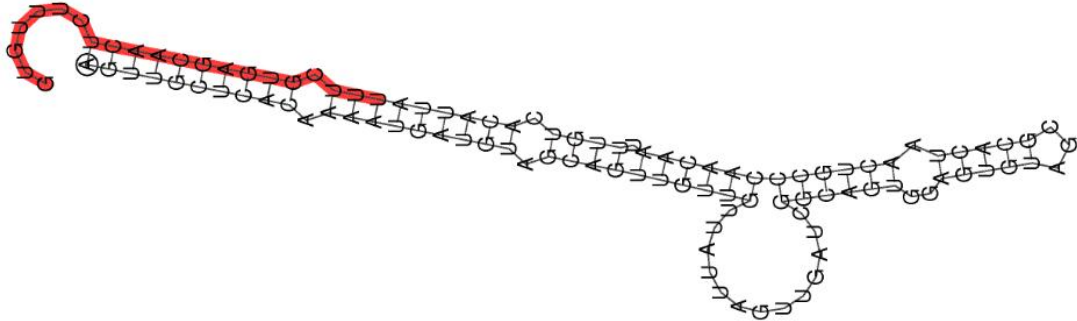

novel\_79 MFE = -71.10 kcal/mol

**UGACAAUAUCAUAUUUAGAUACAA**CCCCUAGAAUGUUUAAAAUUAGACUCCC  
CCCACCCCUACAAACAAAAUAUGGAUUCUGAUUGUGUAUUCUAUGAUUGUU  
UAAAGUGAAAUUCAUUUGUCUGUAGGGGUUGGUCUAAUUUUUAAGCAUCUG  
GGGGUU**AUGUCUAAAUAUGCUAUUUAUCACA**

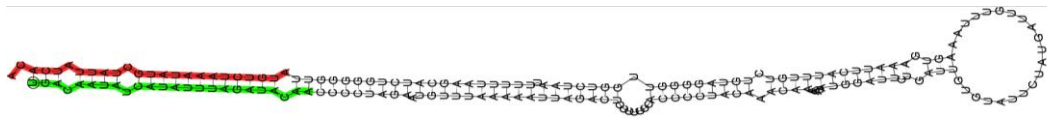

novel\_8 MFE = -31.30 kcal/mol

**UGUGGGUUGUUGGGCAAGACC**AUAGAAACAACGUUGAUGGAGUAUUUGG**UCU**  
**UGCCUACACCGCCCAUACC**

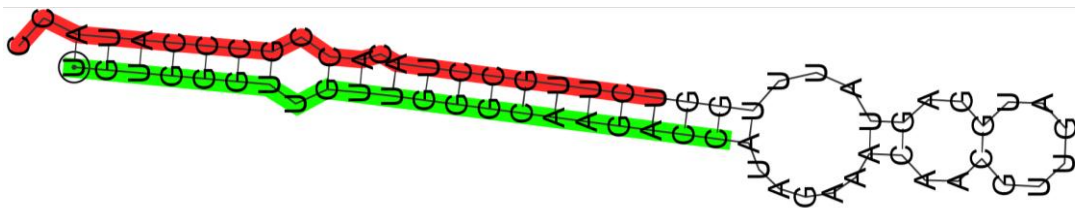

novel\_81 MFE = -48.30 kcal/mol

**AUUUUCAUAAUCAUUAGACUUAUU**CCCUAUUGAGGGAGCAUCUCAAUUGAGG  
AUAUUUAUUUGACUUAUCCCUUGUAAUAAUAAUAAUUUGAGAUGUACC  
CCUAAAUAAGGGGUAAAUCUAACGAUUAUGAAAACAGGGGGU

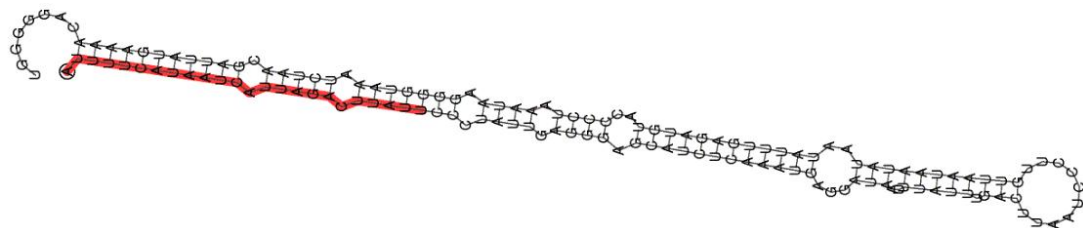

novel\_82 MFE = -18.10 kcal/mol

**UGCUUUGGAAUUGGAAUUG**GAGUCAAGCUAAUUUUUGCUUCAAUCCAAAUCA  
AAAGCUUU

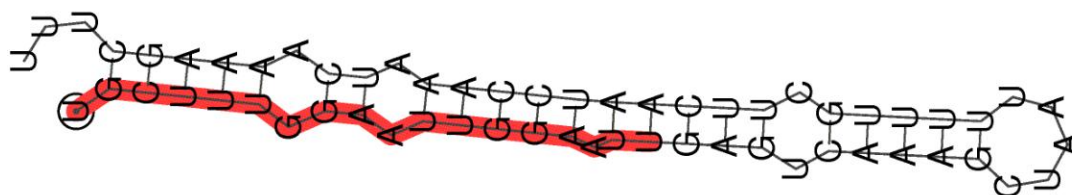

novel\_83 MFE = -73.30 kcal/mol

GUAAUUCUACACUGCCUAGAAUGAUGACUAAAAUAAGGGACUACUGAUG  
AAGACAGUGCAUUGGUUGGUGUAUGAGGUCCAUGAUUAUCAUUUAAUUAU  
UAAUCAUAUACUACUGUCGUAUCAGUUAGUCUCAUUAUUUGAGUUUCUAU**C**  
**AAGAGUUAGUGUAGAAUUACUC**

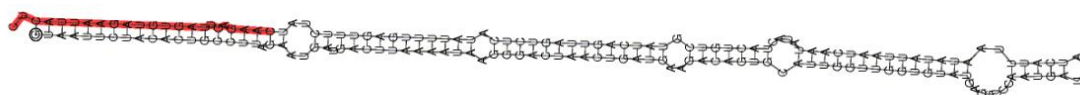

novel\_84 MFE = -68.53 kcal/mol

**AACGAUGACGUUGUGUAAUAGAUU**AAAAGAGGAUAGUUGGAUGGGUGAAGCA  
AAGGUUGAGAUACAUCUGCAAUAAGGGGGUCAUGAAUUUAUAAAAGAGCCA  
UUUGUGCUAUCUAGGCCAUUCAA AAAAUUUAUCCAAUGAUCCUCUUUCAUCGG  
U**UACACCACGUCAUCGUUACAACUA**

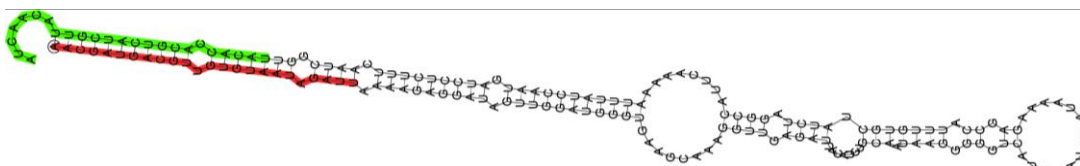

novel\_87 MFE = -23.00 kcal/mol

**UUGGAAUUGGAAUUGAAAUAUUUU**CAGUUCAAAAGGUUCAAUUUUUAGAUC  
AAAUAUCCAAUCCCAAUCCAAU

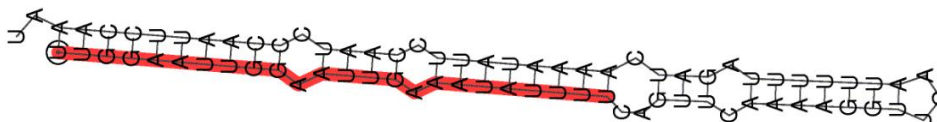

novel\_88 MFE = -63.00 kcal/mol

CAAAGUUUAUCAUAUUUGAGGAUUGGCCCCCAAAGUGUCAAAAAAAAAACAC  
UUUUUCAAUUCUUUAUGAAGUUCUUGUAUGACGUUUUUUAAAUGACAUUUUU  
GGGGCCAACCCU**CAAUAUGAAAAACUUUGGA**

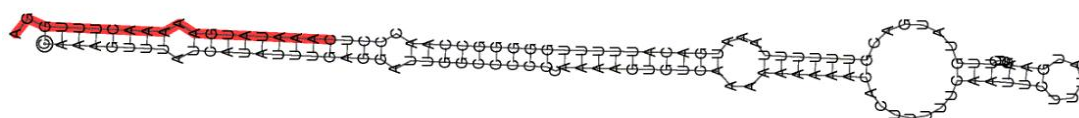



novel\_89 MFE = -70.30 kcal/mol

**AUCAGUUUCACAGAAUAGAGC**UCAAUGAAUUCUUUACUUUCUUUGACCUUUC  
UCGAGUCCAUUUGUACACUUAAGUUCUGUACCAGGAGAAGUAGCUC AAGUAGA  
UGAAGUUACACUUGGUGGUGCUUGUGUAAAUAUCAUCUCUCUCAAAUCCA  
UUGAAAUGUUGCUCAGUUGCCAUUGAGU**UCUAUUCUGUGAAACUGAUGC**

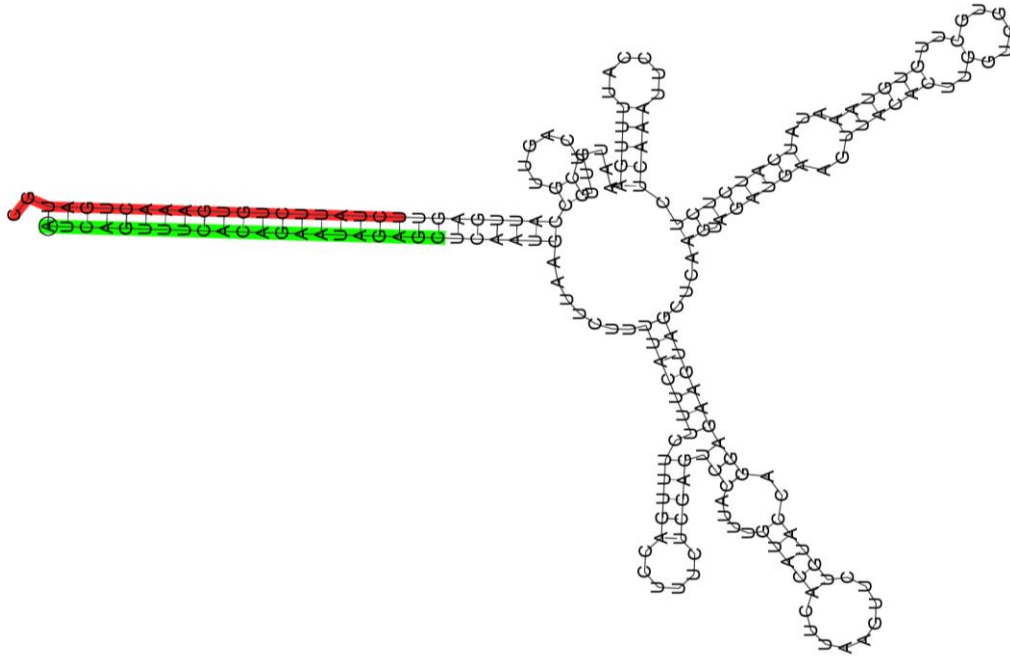

novel\_90 MFE = -76.40 kcal/mol

UUGCCAAUAUCCAAACUAAAAUGGCCUUUCUGUUGGAAUCUCUCACCUUCC  
UUCCACCAUCUGUUUCGUUGUCUGCGAGAAUGCUAGUCCUUGGGUGGCGGUGC  
CUGUUUGGUACUAAAGAGGGUUGCUGCAGCAGACGUUGUGGGGUCAUCAUAG  
UUGGGAUUUUUAGGUGGUGCCG**UUUUAGUUUGGAUUGGCAUCU**

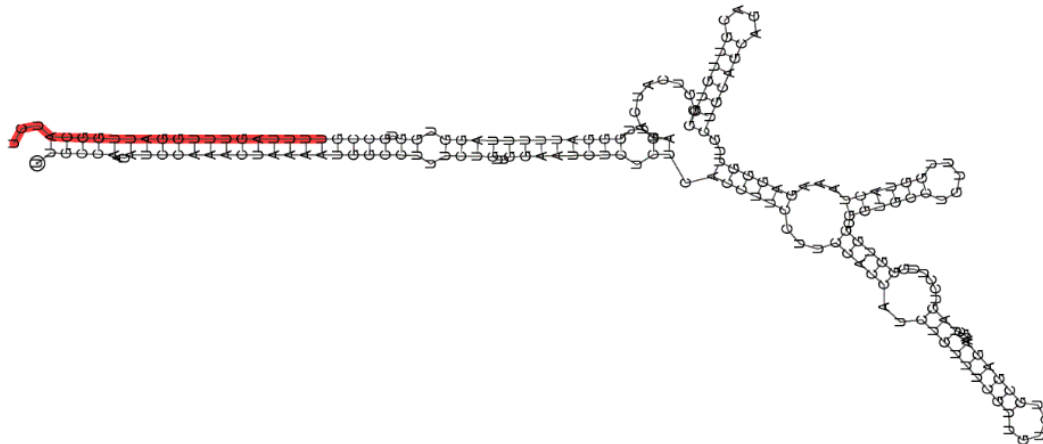

novel\_95 MFE = -100.75 kcal/mol

**CGCUCAUUUGUGACUUUGCAUU**UGAUCCGUGCGGAUUAUCAUGAAUGGAAU  
UGACGGUGACCGUACUCUACCAUCCACGUGACACCCGAGGACGGGUUAGUU

ACGCGAGUUUCGAGUGUGUGGGGUCCAUUUAUGAUGACCGUGAUGACAUAGU  
 AGAUGUUUUGAAGAAGGUGGUGCAAGUUUCCGGCCGGGACAAUGUCAGUG  
 UCCACCACGUGCCAUAAGCCUUGAAGUGUGGACACGUGUUGCCAAUGCAAUCGA  
 GCCACUGGGGAUG **AAAUGCCGAAGUUGCACAAUGGACG**

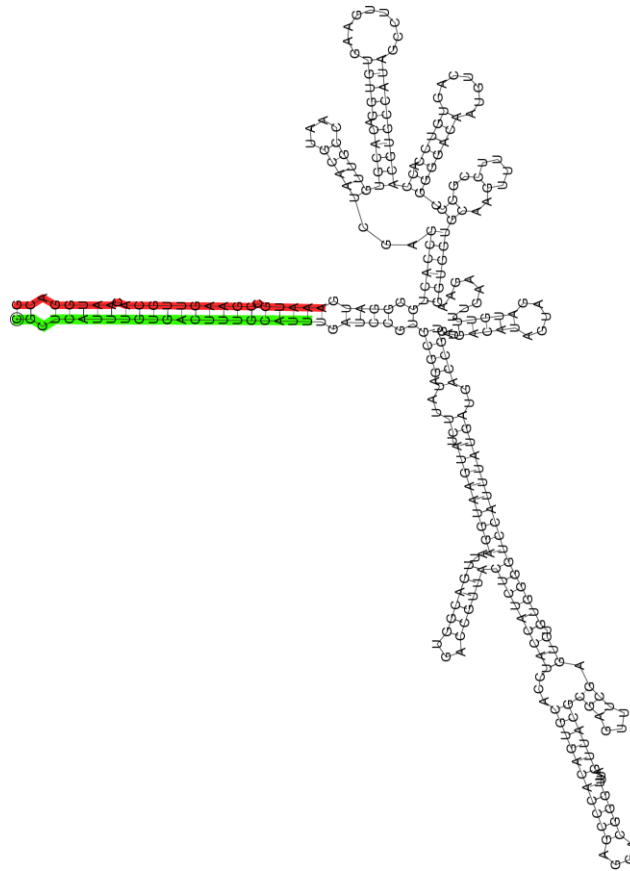

novel\_96 MFE = -46.20 kcal/mol

**UUUGGAUCUCGAAUGUAUAG**AGGAAAACGCAAUAUAUAUUUAUUGUACCGU  
 ACAAUCAAUUGUACCAUAUUUUUCCUAUUCUUGGUGUUCUCCUCUAUACUUUC  
 UGAGAUCUAAACA

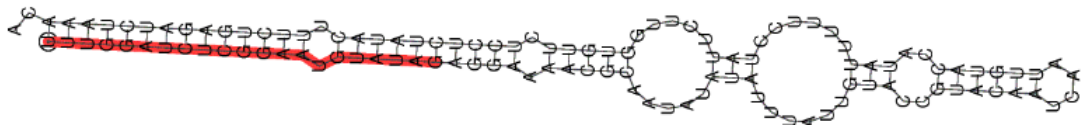

novel\_97 MFE = -37.90kcal/mol

**AAGCUUUGGAAUUGGAAUUGG**AGCAAAUUCAGUUCAAAUUUGAACUAAUUUU  
 GCUU **AAUUCUAAUUCCAAAGCAUGGAAU**

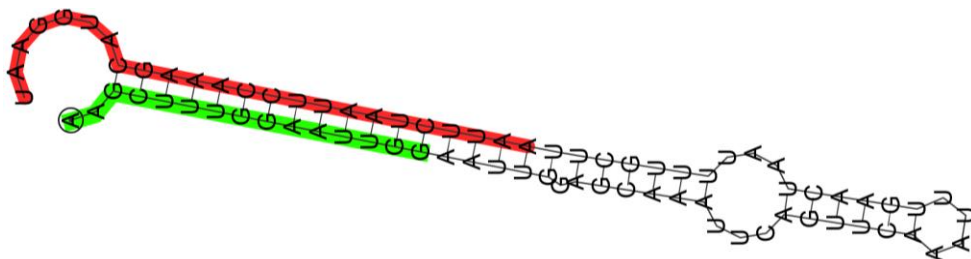

novel\_98 MFE = -85.30 kcal/mol

**UGCCGCACUCAUCUACCAUG**UUCGAAGUCAUUGCCAAAGGCAGUGCUAUUCU  
GAUCGGAAAAAAGGCAGUGCAGUUACUAGUUACUACAGUGAAGUGGCGCA  
GCUGGAUCACCUCCUUUUUAGGGGCGAACUAAUGGUUUUGGCAGGCAGUGAAU  
AGAACAUGGUAAGAUGAGUGUGGUGGA

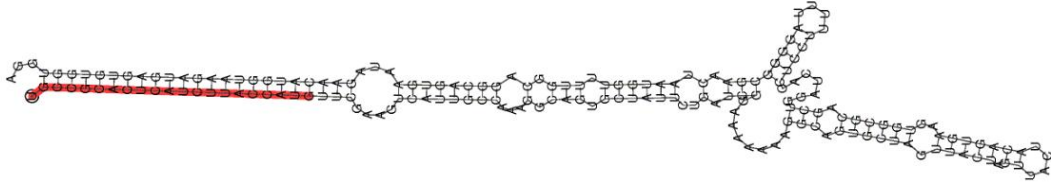

Supplement: 12864_2017_4180_MOESM8_ESM.pdf [file 12864_2017_4180_MOESM8_ESM.pdf]
