# Supplementary material for: miRNAs involved in the development and differentiation of fertile and sterile flowers in Viburnum macrocephalum f. keteleeri
Source: PubMed Central journal article supplement (PMC5640959; doi:10.1186/s12864-017-4180-x), 2017-10-13

**Additional file 20.** miRNAs have opposite tendency between qRT-PCR and sRNA sequencing.

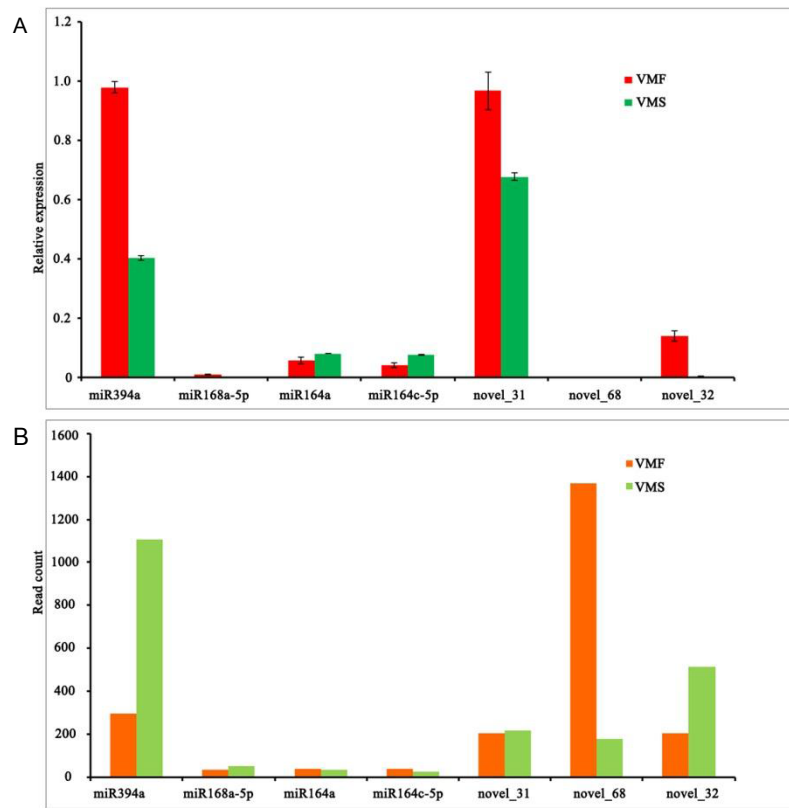

Supplement: 12864_2017_4180_MOESM20_ESM.pdf [file 12864_2017_4180_MOESM20_ESM.pdf]
